1 **Title:** BOLD co-fluctuation ‘events’ are predicted from static functional connectivity  
2 **Authors:** Zach Ladwig<sup>1</sup>, Benjamin A. Seitzman<sup>4</sup>, Ally Dworetzky<sup>2</sup>, Yuhua Yu<sup>2</sup>, Babatunde  
3 Adeyemo<sup>6</sup>, Derek M. Smith<sup>10,11</sup>, Steven E. Petersen<sup>5-9</sup>, Caterina Gratton<sup>1-3</sup>  
4  
5 **Affiliations:**  
6 Departments of Interdepartmental Neuroscience Program<sup>1</sup>, Psychology<sup>2</sup>, Neurology<sup>3</sup> –  
7 Northwestern University  
8 Departments of Radiation Oncology<sup>4</sup>, Radiology<sup>5</sup>, Neurology<sup>6</sup>, Psychological and Brain  
9 Sciences<sup>7</sup>, Neuroscience<sup>8</sup>, and Biomedical Engineering<sup>9</sup> – Washington University St. Louis  
10 School of Medicine  
11 Department of Neurology<sup>10</sup>, Division of Cognitive Neurology/Neuropsychology<sup>11</sup> – The Johns  
12 Hopkins University School of Medicine  
13  
14 **Corresponding Author:** Caterina Gratton ([caterina.gratton@northwestern.edu](mailto:caterina.gratton@northwestern.edu))  
15

16 **ABSTRACT**

17 Recent work identified single time points (“events”) of high regional co-fluctuation in functional  
18 Magnetic Resonance Imaging (fMRI) which contain more large-scale brain network information  
19 than other, low co-fluctuation time points. This suggested that events might be a discrete,  
20 temporally sparse signal which drives functional connectivity (FC) over the timeseries. However,  
21 a different, not yet explored possibility is that network information differences between time  
22 points are driven by sampling variability on a constant, static, noisy signal. Using a combination  
23 of real and simulated data, we examined the relationship between co-fluctuation and network  
24 structure and asked if this relationship was unique, or if it could arise from sampling variability  
25 alone. First, we show that events are not discrete – there is a gradually increasing relationship  
26 between network structure and co-fluctuation; ~50% of samples show very strong network  
27 structure. Second, using simulations we show that this relationship is predicted from sampling  
28 variability on static FC. Finally, we show that randomly selected points can capture network  
29 structure about as well as events, largely because of their temporal spacing. Together, these  
30 results suggest that, while events exhibit particularly strong representations of static FC, there is  
31 little evidence that events are unique timepoints that drive FC structure. Instead, a parsimonious  
32 explanation for the data is that events arise from a single static, but noisy, FC structure.

33

34 **KEYWORDS**

35 Resting-state fMRI, co-fluctuations, events, simulations, RSFC, networks

36

37 **HIGHLIGHTS**

- 38
- 39 • Past results suggested high co-fluctuation BOLD “events” drive fMRI functional  
40 connectivity, FC
  - 41 • Here, events were examined in both real fMRI data and a stationary null model to  
42 test this model
  - 43 • In real data, >50% of BOLD timepoints show high modularity and similarity to time-  
44 averaged FC
  - 45 • Stationary null models identified events with similar behavior to real data
  - 46 • Events may not be a transient driver of static FC, but rather an expected outcome of it.

## 47 INTRODUCTION

48 The human brain is organized in large-scale systems, or ‘networks,’ with coordinated  
49 functions such as the visual network, somatomotor network, and default mode network. In  
50 humans, these networks can be identified by grouping regions of the brain that have highly  
51 correlated spontaneous BOLD fMRI signals - regions with high “functional connectivity (FC)”  
52 (Biswal et al., 1995; Power et al., 2011; Yeo et al., 2011). These FC networks have been shown  
53 to have a canonical spatial layout (most people have the same networks represented in the  
54 same locations), with stable patterns of individual variation (each person’s network topography  
55 is slightly different from the canonical layout and consistent within themselves across time  
56 (Gordon et al., 2017; Gratton et al., 2018; Laumann et al., 2015; Seitzman et al., 2019). At both  
57 the individual and group level, functional network topology accurately predicts which regions of  
58 the brain will be activated during specific tasks (Braga et al., 2020; Gordon et al., 2017; Smith et  
59 al., 2009; Tavor et al., 2016) and variations in network topology are related to individual  
60 differences in behavior outside of the scanner (Bijsterbosch et al., 2018; Kong et al., 2019;  
61 Smith et al., 2015; van den Heuvel et al., 2009)

62 However, analysis of spontaneous fMRI data is not straightforward. Unlike in task-fMRI,  
63 there is no predefined temporal structure that can be used to separate relevant signals from  
64 artifactual signals. Instead, typical analyses of spontaneous (resting-state) fMRI remove  
65 physiological artifacts (motion, respiration, cardiac rhythms, etc.) and assume the residual signal  
66 is the neural signal of interest (Power et al., 2020). It is typically presumed that this signal is  
67 equally present at all moments and FC is calculated using all available data over long periods.  
68 However, recent work suggested that rather than being constantly present, FC information  
69 might be inordinately present at particular time points called “events” (Esfahlani et al., 2020).  
70 Esfahlani and colleagues found that “events,” time points with the highest BOLD signal  
71 co-fluctuation, reproduce static functional connectivity patterns better than the same number of  
72 “non-events,” time points with the lowest BOLD signal co-fluctuation, and require relatively few  
73 timepoints to reproduce them well. The authors concluded that rather than functional network  
74 structure being present at all timepoints, it is driven by events – a discrete and temporally  
75 sparse phenomena (Esfahlani et al., 2020). This idea has deep implications for the field: a  
76 thorough analysis of events across brain organizational levels (e.g., from systems to cellular  
77 recordings) could reveal information about the physiological mechanisms of FC and new  
78 analysis methods focused on events could improve the clinical utility of fMRI (Esfahlani et al.,  
79 2021; Greenwell et al., 2021).

80 But, there are alternative interpretations of these findings which have not yet been  
81 explored. First, it is possible that differences between “events” and “non-events” are driven by  
82 contamination in “non-events” (motion, respiration, etc.) rather than by a unique signal present  
83 during “events.” Second, it has been shown that random sampling variability in BOLD data is  
84 high and alone can create the appearance of discrete states in stationary FC simulations (Hlinka  
85 & Hadrava, 2015; Laumann et al., 2017). This principle may apply here too – sampling  
86 variability could make a subset of single points look extreme, even if they are drawn from a  
87 continuous distribution around a static FC matrix (note that if this were the case, events  
88 methodology may still be a useful way to rapidly and accurately reproduce static FC structure,  
89 but this outcome would suggest that a deep focus on events physiology relative to other  
90 timepoints has less utility). In this paper, we ask (1) if events are unique points which drive FC,  
91 (2) if non-events are unique points with high contamination, or (3) if events and non-events are  
92 an expected consequence of static FC and sampling variability.

93 To answer these questions, we conduct a series of analyses on real and simulated data.  
94 First, we use real data from the Midnight Scan Club dataset to test how unique events and non-  
95 events are by examining whether their properties differ markedly from intermediate timepoints.  
96 Second, we create models of simulated static BOLD data to see if sampling variability on a

97 static signal is sufficient to explain event behavior. Finally, we examine why events are able to  
98 recreate static FC structure with so few time points.  
99

## 100 **MATERIALS AND METHODS**

101

### 102 ***Overview and Dataset***

103 The goal of this project was to investigate if high co-fluctuation moments in resting state fMRI  
104 BOLD signals are discrete events that drive functional connectivity. We used a combination of  
105 real and simulated data for these analyses.  
106

107

108 The publicly available Midnight Scan Club (MSC) dataset was used as our real sample dataset.  
109 The MSC dataset contains fMRI data from 10 highly sampled individuals (5 females, ages 24-  
110 34). The data for each subject was collected across 10 fMRI sessions within 7 weeks. Across  
111 these sessions, the MSC dataset includes 5 hours of resting state fMRI; this resting-state data is  
112 the focus of our analyses. One participant (MSC08) has been excluded from these analyses  
113 because of head motion and drowsiness during rest. For single session-analysis and  
114 simulations, sessions with less than 333 usable timepoints (6/90 sessions) were excluded. All  
115 data collection was approved by the Washington University Internal Review Board and written  
116 informed consent was received from all participants. The dataset and processing have been  
117 previously described in detail (Gordon et al., 2017). A summary of relevant details is provided  
118 below.

118

### 119 ***MRI Acquisition***

120 MRI data were acquired on a Siemens 3T Magnetom Tim Trio with a 12-channel head coil. T1-  
121 weighted (sagittal, 224 slices, 0.8 mm isotropic resolution, TE = 3.74ms, TR = 2.4s, TI = 1.0s,  
122 flip angle = 8 degrees), T2-weighted (sagittal, 224 slices, 0.8 mm isotropic resolution, TE =  
123 479ms, TR = 3.2s) and functional (gradient-echo EPI sequence, TE = 27ms, TR = 2.2 s, flip  
124 angle = 90, voxels = isotropic 4mm<sup>3</sup>, 36 axial slices) MRI images were collected. Thirty minutes  
125 of resting-state fMRI were collected at the start of each session.  
126

126

### 127 ***Preprocessing***

128 Data processing for the MSC dataset is explained in detail elsewhere (Gordon et al., 2017).  
129 Relevant details for this project are shared below.  
130

130

131 Structural MRI Processing: For each participant, T1 images were averaged together and used  
132 to generate a cortical surface in Freesurfer (Dale et al., 1999). These surfaces were hand-edited  
133 and registered into fs\_LR\_32k surface space (Glasser et al., 2013).  
134

134

135 Functional MRI Processing: Slice time correction, motion correction, and intensity normalization  
136 to mode 1000 were all completed in the volume. The functional data was then registered to the  
137 T2 image (which was registered to the T1 image registered to template space), resampled to  
138 3mm isotropic resolution and distortion corrected (Gordon et al., 2017). All alignments were  
139 applied in a single step.  
140

140

141 Functional Connectivity Processing: Described in detail elsewhere (Power et al., 2014),  
142 preprocessing steps were taken to reduce the effect of artifacts on functional network analysis.  
143 This included the regression of nuisance signals (white matter, ventricles, global signal, motion  
144 and derivative and expansion terms), scrubbing of high motion frames (FD > 0.2 mm), and  
145 bandpass filtering (0.009 Hz to 0.08 Hz). For two subjects (MSC03 and MSC10), motion  
146 parameters were low pass filtered before censoring to address respiratory activity in the motion



147 traces (Fair et al., 2020; Gordon et al., 2017). Functional data was then registered to the surface  
148 and spatially smoothed (FWHM = 6 mm, sigma = 2.55) (Marcus et al., 2011).

149

### 150 ***Network and region definition***

151 All analyses were done on parcellated timeseries extracted using a group-level map of 333  
152 cortical parcels (Gordon et al., 2016). These 333 parcels can be split into 12 functional systems:  
153 somatomotor (SM), somatomotor lateral (SM-lat), visual (Vis), auditory (Aud), cingulo-opercular  
154 (CO), salience (Sal), frontoparietal (FP), dorsal attention (DAN), ventral attention (VAN), default  
155 mode (DMN), parietal memory (PMN), and retrosplenial (RSP). These systems are used to  
156 group parcels in the visualization of FC matrices.

157

### 158 ***Comparisons between events and static functional connectivity in real data***

159 Our first goal was to compare the network structure present in events, non-events, and  
160 intermediate bins. We followed the approach used in Esfahlani et al., 2020, calculating the RSS  
161 (root-sum-square) confluctuation for each timepoint and binning timepoints by their RSS  
162 confluctuation value. We compared the network structure present in each bin by creating FC  
163 matrices for each bin and calculating the similarity between bin FC and whole session FC and  
164 the modularity of bin FC. These measures are defined below.

165

166 *Cofluctuation Time Series and Events*: The method for calculating confluctuation and identifying  
167 events has been fully described elsewhere (Esfahlani et al 2020). It was followed exactly and is  
168 summarized here. The original fMRI BOLD timeseries was z-scored per parcel. For each edge  
169 (a unique pair of parcels), the z-scored values at each timepoint were multiplied, resulting in an  
170 edges X timepoints matrix. As described elsewhere, this timeseries (also called the edge-time-  
171 series), represents the exact contribution of each timepoint to static FC (Esfahlani et al., 2020).  
172 For each time point, the RSS (root-sum-square) across parcels was calculated, resulting a 1 X  
173 timepoints matrix containing the RSS confluctuation value at each timepoint. Timepoints were  
174 binned based on RSS confluctuation value in 5% bins, with the 5% of points with highest  
175 confluctuation in bin one, the next 5% of points in bin two and so on.

176

177 *Functional Connectivity (FC)*: For each session and subject, functional connectivity matrices  
178 were calculated using either the timepoints from the full session ('static' FC matrices) or from  
179 the timepoints in each bin (cofluctuation bin FC matrices). In all cases, FC was calculated by the  
180 product moment correlation between each pair of parcel timeseries, resulting in a 333X333  
181 functional network matrix. Parcels were grouped by functional system for visualization. Edges  
182 within the diagonal blocks represent within-system correlations, and edges in the off-diagonal  
183 blocks represent between-system correlations.

184

185 *Similarity*: Similarity between each bin's FC and whole-session 'static' FC was calculated by  
186 vectorizing both matrices and taking the correlation between them.

187

188 *Modularity*: Modularity was calculated for each bin as measure of network structure. Modularity  
189 maximization is a strategy used to arrange nodes into communities in which there are more  
190 edges within communities than expected by random chance. Each matrix was thresholded for  
191 sparseness, keeping only the top 5% of weighted edges (5% edge density). Then, all remaining  
192 edge weights were set to 1, making the graph unweighted. Newman's spectral optimization was  
193 used to identify the optimal network structure. This structure was then quantified using  
194 Newman's modularity statistic, Q, which measures the fraction of within-network edges minus  
195 the expected value of within-network edges in a network with the same communities but random  
196 connections (Newman & Girvan, 2004). Larger values of modularity reflect stronger community  
197 structure than expected by chance.

198

199 ***Comparisons between events and static functional connectivity in simulated data***

200 Our second goal was to test whether the relationship between network structure and  
201 confluctuation found in real data could be explained by sampling variability in a stationary model.  
202 To examine this, we created simulated data with the same dimensionality and static covariance  
203 structure as BOLD data but sampled from a random Gaussian distribution.

204

205 *Simulated BOLD Data:* For each subject and session, data was sampled from a Gaussian  
206 distribution in the dimensionality of the real data from that session. Separately, a static FC  
207 matrix was calculated from the full 30 minutes of real data. The random timeseries were  
208 projected on to the eigenvectors derived from the static FC matrix, resulting in data matched in  
209 dimensionality and covariance structure with real BOLD data but stationary by construction. This  
210 strategy is largely adapted from prior simulation work (Laumann et al., 2017). We then did the  
211 same analysis in the simulation data as was described above for real data – calculating  
212 confluctuation, binning frames by confluctuation, and comparing the network structure present in  
213 each bin with two measures (similarity to static FC and modularity).

214

215 *Simulated Toy Model:* To aid in our second goal, we did a supplementary analysis investigating  
216 the relationship between network structure and confluctuation in a very simple non-BOLD-like  
217 data set. The data set comprised of 4 nodes total – 2 anti-correlated networks with two nodes  
218 each. Network A was defined by the simple sine(x) wave, and both network A nodes were given  
219 that signal. Network B was defined by sine(x +  $\pi/2$ ) and both network B nodes were given that  
220 signal. Normally distributed random noise of half the magnitude as the real signal was added to  
221 all four nodes. Then, confluctuation was calculated for each timepoint, timepoints were binned by  
222 confluctuation, and similarity with time-averaged FC calculated for each bin.

223

224 ***Temporal Spacing Analysis***

225 Our third goal was to compare the effects of different sampling methods on the network  
226 structure present in the sampled points. We specifically wanted to investigate the effect of  
227 temporal spacing on network structure.

228

229 *Comparison of Sampling Methods*

230 For each subject and session, we examined the network structure present in four groups of time  
231 points: high confluctuation points (selected as the top 5% of points with highest RSS  
232 confluctuation), low confluctuation points (selected as the bottom 5% of points with the lowest RSS  
233 confluctuation), consecutive points (5% of points selected consecutively beginning at a random  
234 point of the session and wrapping around when needed), and random points (5% of points  
235 selected randomly from the session). For consecutive samples, 100 iterations were done for  
236 each session to not bias the result by starting location. We further tested this by varying the  
237 number of time points selected rather than choosing 5% of time points. The number of time  
238 points was varied from 1 to 100.

239

240 *Circular Offset Analysis*

241 In a supplemental analysis, we examined the relationship between confluctuation and network  
242 structure after removing temporal spacing effects. To do this, we binned time points by  
243 confluctuation and then circularly shifted them by 1-10 points in both directions to maintain the  
244 temporal spacing found in the original binning while varying their confluctuation values. However,  
245 because we previously scrubbed high motion points from this data set, it was not possible to  
246 select 5% of time points (as in other binned analyses) and shift them without running into  
247 scrubbed points. To address this issue, we randomly sampled only 5 points per bin and used  
248 fewer bins (95-100, 85-90, 70-75, 45-50, 20-25, 0-5). This resulted in a smaller number of

249 analyzed sessions with lower peak similarities for this analysis. To reduce bias from random  
250 sampling, we did 100 iterations and averaged the results.

251

### 252 **Dataset and Code Availability**

253 MSC data has been made publicly available

254 (<https://openneuro.org/datasets/ds000224/versions/1.0.3>). The parcellated timeseries used for

255 these analyses is available here ([https://github.com/GrattonLab/MS\\_C\\_ROI\\_data](https://github.com/GrattonLab/MS_C_ROI_data)). The code for

256 the analyses in this paper is available at

257 ([https://github.com/GrattonLab/Ladwig\\_2022\\_Events\\_Static\\_FC](https://github.com/GrattonLab/Ladwig_2022_Events_Static_FC)) which will be made public upon  
258 publication.

259

## 260 **RESULTS**

261

### 262 **Overview:**

263 Previous work showed that moments with high amplitude cofluctuations in BOLD, or “events”,  
264 estimate static functional connectivity patterns better than low cofluctuation moments, and can  
265 do so with relatively few timepoints (Esfahlani et al., 2020). This suggested that (1) high  
266 cofluctuation events may be unique, transient phenomena which drive the large-scale network  
267 organization that we observe over long timeseries (Esfahlani et al., 2020). But there are  
268 alternate interpretations of this result: (2) differences between low and high cofluctuation could  
269 be driven by low cofluctuation timepoints exhibiting more BOLD artifacts (e.g., motion or  
270 respiration) that disrupt functional connectivity measures or (3) events may arise as a  
271 consequence of sampling from a continuous distribution, where some moments will, by chance,  
272 exhibit higher cofluctuation than others.

273

274 In this work, we test these three hypotheses. We test how network structure changes over a  
275 range of cofluctuation amplitudes, ask if this relationship is present in stationary simulated data,  
276 and analyze why events can recreate static correlation structure with so few time points.

277

### 278 **1. Network structure is continuously related to cofluctuation**

279 First, we examined the relationship between BOLD cofluctuation and network structure across a  
280 range of cofluctuation amplitudes. Our hypotheses are visualized in **Fig. 1A**. If events are  
281 specialized discrete timepoints that drive network structure, then they should especially well  
282 represent network structure (purple) relative to other points. If low cofluctuation points are  
283 discrete timepoints more contaminated by artifacts, they should especially poorly represent  
284 network structure (yellow). If BOLD cofluctuations exhibit random variation as would be  
285 expected from sampling variation, then there should be a continuous relationship between  
286 cofluctuation amplitude and network structure (green).

287

288 For each participant and resting state session (30 minutes), we calculated BOLD cofluctuation  
289 amplitude at each timepoint (after standard preprocessing and denoising to improve alignment  
290 and remove artifacts, including those associated with motion, see *Methods*). In Esfahlani et al.,  
291 2020, events were defined as the top 5% of timepoints ranked by cofluctuation. We extended  
292 this, grouping timepoints in each session into discrete 5% bins based on their cofluctuation (**Fig.**  
293 **1B**). For each bin, we calculated an FC matrix using Pearson’s correlation (**Fig. 1C**) and  
294 computed measures of network structure as in Esfahlani et al. 2020. (**Fig. 1D-E**).

295

296 We reproduced both results from Esfahlani et al., 2020 showing that compared to FC from the  
297 lowest cofluctuation bin (“non-events”), FC from events is more similar to whole-session FC  
298 ( $r_{\text{events}} = 0.792$ ,  $r_{\text{lowest}} = 0.514$ ,  $t(89) = 42.2$ ,  $p = 1.2\text{e-}60$ ) and more modular ( $q_{\text{events}} = 0.562$ ,  $q_{\text{lowest}}$   
299  $= 0.478$ ,  $t(89) = 12.3$ ,  $p = 6.0\text{e-}21$ ) (**Fig. 1D, E**). However, when we examined the relationship

300 across intermediate bins, we found that both metrics increased gradually with cofluctuation, not  
 301 discretely for events. The increase was especially gradual at high values of cofluctuation. In  
 302 fact, the top bin (events) was not substantially different than the 70<sup>th</sup> percentile bin ( $r_{\text{events}} =$   
 303  $0.792$  vs.  $r_{70} = 0.797$ ,  $r_{\text{diff}} = -0.005$ ,  $t(89) = 0.48$ ,  $p = 0.31$ ; modularity:  $q_{\text{events}} = 0.562$  vs.  $q_{70} =$   
 304  $0.561$ ,  $q_{\text{diff}} = -0.001$ ,  $t(89) = 0.15$ ,  $p = 0.45$ ) and only slightly different than the 50<sup>th</sup> percentile bin  
 305 ( $r_{50} = 0.740$ ,  $q_{50} = 0.546$ ,  $r_{\text{diff}} = 0.052$ ,  $q_{\text{diff}} = 0.016$ ). Low cofluctuation points, while substantially  
 306 different from events, were not obviously discrete when compared with the 10<sup>th</sup> and 20<sup>th</sup>  
 307 percentile bins ( $r_{\text{lowest}} = 0.514$ ,  $q_{\text{lowest}} = 0.478$ ,  $r_{10} = 0.579$ ,  $q_{10} = 0.499$ ,  $r_{20} = 0.637$ ,  $q_{20} = 0.515$ ).  
 308 Notably, many sets of points explicitly excluding events still recapitulate network structure well.  
 309 These relationships were consistent in all 9 subjects (lines in **Fig. 1D-E**, separated by session in  
 310 **Fig. S1**), suggesting that neither high nor low cofluctuation points are discrete, specialized,  
 311 timepoints that drive network structure (or the lack thereof). Rather, network structure appears  
 312 to be present in all bins, with variability that is positively correlated with the cofluctuation  
 313 amplitude of a given time point. These results do not suggest that there are a small number of  
 314 time points which drive functional connectivity.

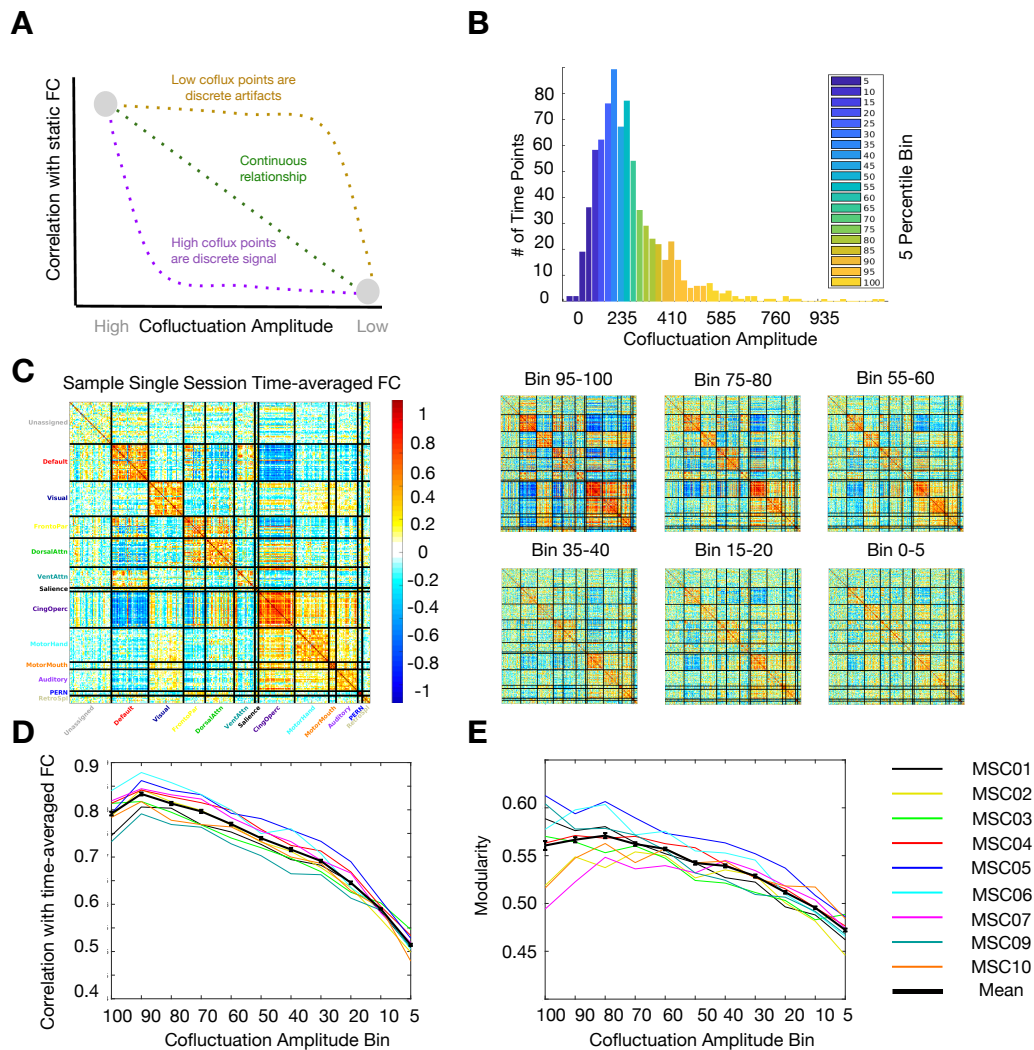

315 **Fig 1: Network structure varies continuously with BOLD cofluctuation.** (A) Previous literature  
 316 showed that high cofluctuation events contain stronger network structure than low cofluctuation  
 317 points (gray dots). We posited three hypotheses: (1) high cofluctuation points are discrete  
 318 phenomena which drive network structure (purple), (2) low cofluctuation points are discrete  
 319



320 artifacts which do not contain network structure (yellow), or (3) there is a continuous gradual  
321 relationship between confluctuation magnitude and network structure as would be expected from  
322 sampling variability (green). (B) To test these hypotheses, we binned time points into 5  
323 percentile bins of increasing confluctuation. See example histogram here from MSC05 session 4.  
324 (C) For each bin, we calculated an FC matrix (examples here from MSC02 session 5) and  
325 calculated two measures of network structure – similarity to static FC and modularity. (D)  
326 Similarity to static FC increased gradually with confluctuation for all subjects (black line = mean,  
327 colored lines = subjects, error bars represent SEM for the group). (E) Modularity increased  
328 gradually with confluctuation as well. These results suggest that neither high nor low confluctuation  
329 time points are discrete, unique entities.

330

## 331 **2. Stationary simulations produce similar behavior to BOLD events and non-events**

332

333 Above, we found that there was a consistent and gradual relationship between BOLD  
334 confluctuation amplitude and network structure. Next, we asked, what drives this relationship?  
335 One possible explanation is sampling variability: with noisy data, some timepoints will have  
336 higher similarity to the session average, while others will have lower similarity, simply by  
337 chance. Here, we tested whether sampling variability could account for event behavior by  
338 creating and analyzing a simulated BOLD dataset with stationary covariance structure. In this  
339 simulated dataset, as in the real data in the previous section, we identified points of high and  
340 low confluctuation and compared their relationship to network structure.

340

341 The procedure to generate simulated data is shown in **Fig. 2A**. For each subject and  
342 session, data was generated by sampling from a Gaussian distribution in the dimensionality of  
343 real data. This data was then projected on to the eigenvectors of the static correlation structure  
344 from the real BOLD data for that subject and session, resulting in random Gaussian data with  
345 stationary correlation structure matching real data (see *Methods*).

345

346 The analysis from **Figure 1** was repeated on the simulated data. We calculated  
347 confluctuation for each time point, binned time points by confluctuation, computed FC matrices for  
348 each bin, and compared the network structure properties across bins.

348

349 We found that the relationship between network structure and confluctuation in simulated  
350 data was remarkably similar to the one found in real data. Similarity to static FC (**Fig. 2B**) and  
351 modularity (**Fig. 2C**) both showed gradually increasing relationships with confluctuation in the  
352 simulated data, just as in real data. Visually, the network structure present in each bin was  
353 remarkably similar between simulated and real data (**Fig. 2D**). These results were consistent  
354 within individuals and sessions (**Fig S2**). These results suggest that the difference between high  
355 and low confluctuation moments and their relationship to network structure can be explained by  
356 sampling variability alone. Further, we note that even very simple toy models made from  
357 correlated sine waves and noise show points of high and low confluctuation amplitude and a  
358 gradually increasing relationship between confluctuation amplitude and network structure (**Fig.  
S3**), indicating this property is not specific to BOLD data.

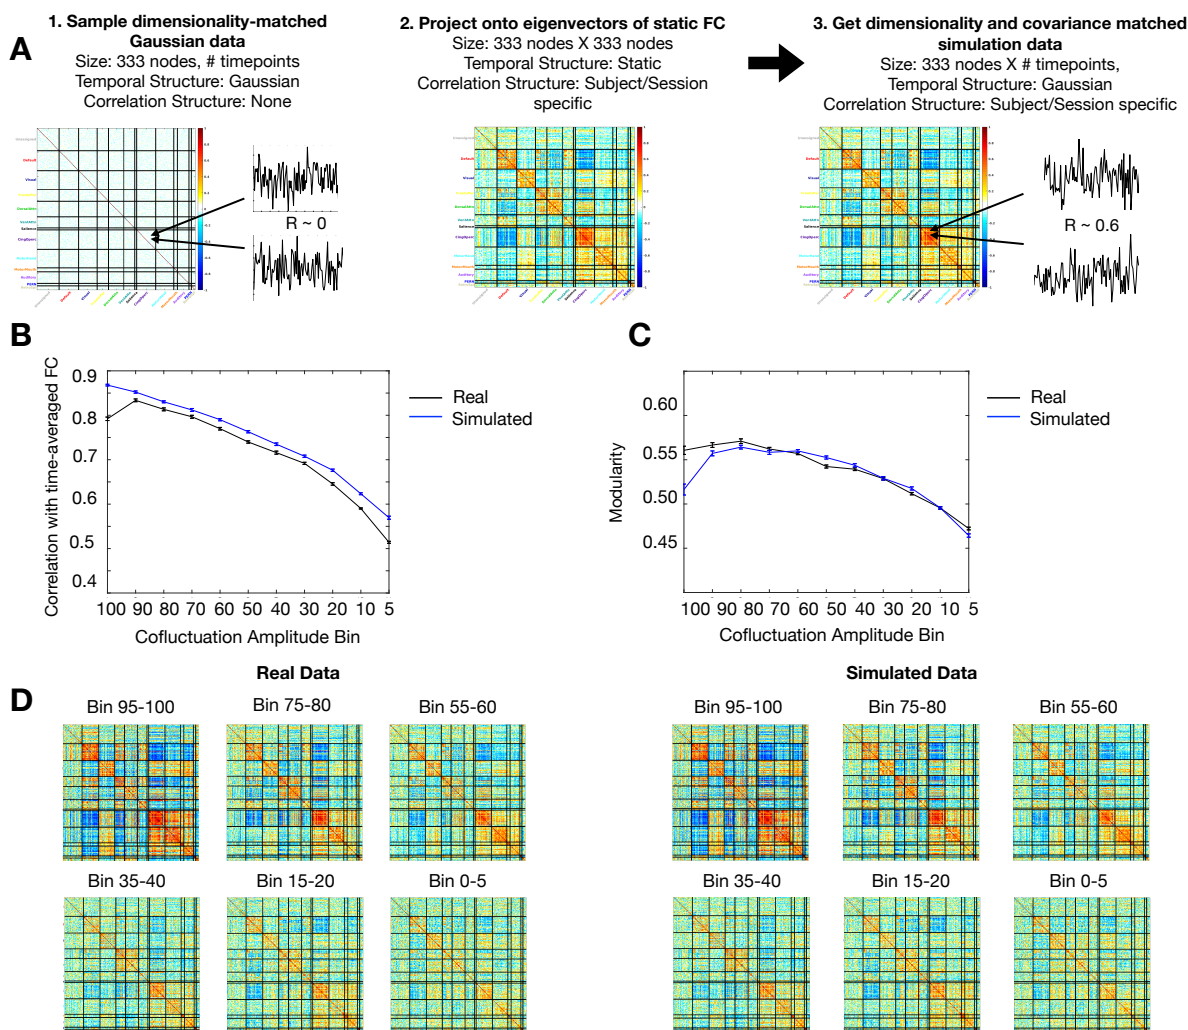

359  
 360 **Fig 2:** Sampling variability alone can produce event-like behavior. (A) For each subject and  
 361 session, we generated a dimensionality-matched timeseries sampled from a Gaussian  
 362 distribution. This time series was projected onto the eigenvectors of static FC calculated from  
 363 that session. This yielded a simulated random Gaussian data set with BOLD-matched  
 364 dimensionality and covariance structure. (B, C) Using the same analysis methods as in Fig 1,  
 365 we found that the relationship between network structure and cofluctuation in simulated data  
 366 was remarkably similar to the one found in real data. Both (B) similarity with session FC and (C)  
 367 modularity increased gradually just as they did in real data. (D) Visually, the FC matrices made  
 368 from specific cofluctuation bins look similar between simulated and real data. The data shown is  
 369 an example from a single session: MSC02 Session 5. These results suggest the relationship  
 370 between network structure and cofluctuation amplitude can be explained by sampling variability  
 371 and static FC.

### 372 373 3. Randomly selected timepoints can also reproduce network structure

374 One particularly notable property of events is their ability to recapitulate network structure with a  
 375 small number of timepoints. As shown in **Fig. 1** and Esfahlani et al., 2020, 5% of time points in a  
 376 30-minute resting state session (approximately 1.5 min. of total data) show high similarity with  
 377 the static FC calculated from the whole session ( $r = 0.792$ ). In contrast, past work (Gordon et



378 al., 2017; Laumann et al., 2015; Noble et al., 2017) suggests that large amounts (> 30 min.) of  
379 resting state fMRI data collection are required to achieve high reliability. This discrepancy  
380 appears to bolster the suggestion that events are discrete transient phenomena which drive  
381 static functional connectivity.

382  
383 However, in the previous sections, we showed that events are not unique in their ability to  
384 reproduce static FC (**Fig. 1D**). Many other points can recreate static FC. The 70<sup>th</sup> percentile  
385 points were correlated with static FC at  $r = 0.797$  and the 50<sup>th</sup> percentile points are correlated at  
386  $r = 0.740$ . These results raise the question: is the ability for a few points to recreate session FC  
387 driven by cofluctuation or something else?

388  
389 We hypothesized that this apparent discrepancy was related to how the events methodology  
390 samples time points. One reason that substantial data is required for reliable FC measures is  
391 because BOLD data is autocorrelated – each time point shares information with the time points  
392 around it. In contrast, the events methodology is not constrained to select temporally adjacent  
393 points. Looking at a sample timeseries, it is obvious that events are more spread out than  
394 consecutive points (**Fig. 3A**). This is confirmed by looking at the histogram of the distance  
395 between events (**Fig. 3B**).

396  
397 To test the effect of temporal spacing on network structure, we compared 5% of points (a)  
398 sampled consecutively (starting from a random section of the scan), (b) sampled randomly  
399 across the whole scan, (c) sampled from the highest cofluctuation points (events), and (d)  
400 sampled from the lowest cofluctuation moments. **Fig. 3C** shows the result: randomly sampled  
401 points are similarly correlated with the static session FC structure as events ( $r_{\text{random}} = 0.78$ ,  $r_{\text{events}}$   
402  $= 0.79$ ,  $t(89) = 1.7$ ,  $p = 0.045$ ). Random points show substantially higher similarity to static  
403 session FC than either low cofluctuation points ( $r_{\text{low}} = 0.50$ ,  $t(89) = 43.0$ ,  $p = 1.3e^{-60}$ ), or  
404 consecutively sampled time points ( $r_{\text{consecutive}} = 0.58$ ,  $t(89) = 35.2$ ,  $p = 2.42e^{-54}$ ). These results are  
405 consistent over a range of bin sizes (**Fig. 3D**), suggesting that random temporal spacing is  
406 sufficient to estimate FC well.

407  
408 However, high cofluctuation points are not perfectly matched in spacing to random points  
409 (several occur in close succession relative to what would be expected in a random distribution,  
410 although they are more distributed than a typical consecutive timepoint FC analysis). To  
411 disambiguate the effects of cofluctuation magnitude and temporal spacing, we circularly shifted  
412 the cofluctuation-binned time points (see *Methods*) to keep temporal spacing constant and vary  
413 cofluctuation. We found that after accounting for temporal spacing, there remained a graded  
414 hierarchy where higher cofluctuation points contained more network structure than lower  
415 cofluctuation time points (**Fig. S4**). The simulation results in the previous section suggest that  
416 this is expected and can be parsimoniously explained by sampling variability. Jointly, these  
417 findings suggest that the ability to recreate network structure with a few time points is a function  
418 of both temporal spacing (as shown here) and sampling variability (as shown in the previous  
419 section).

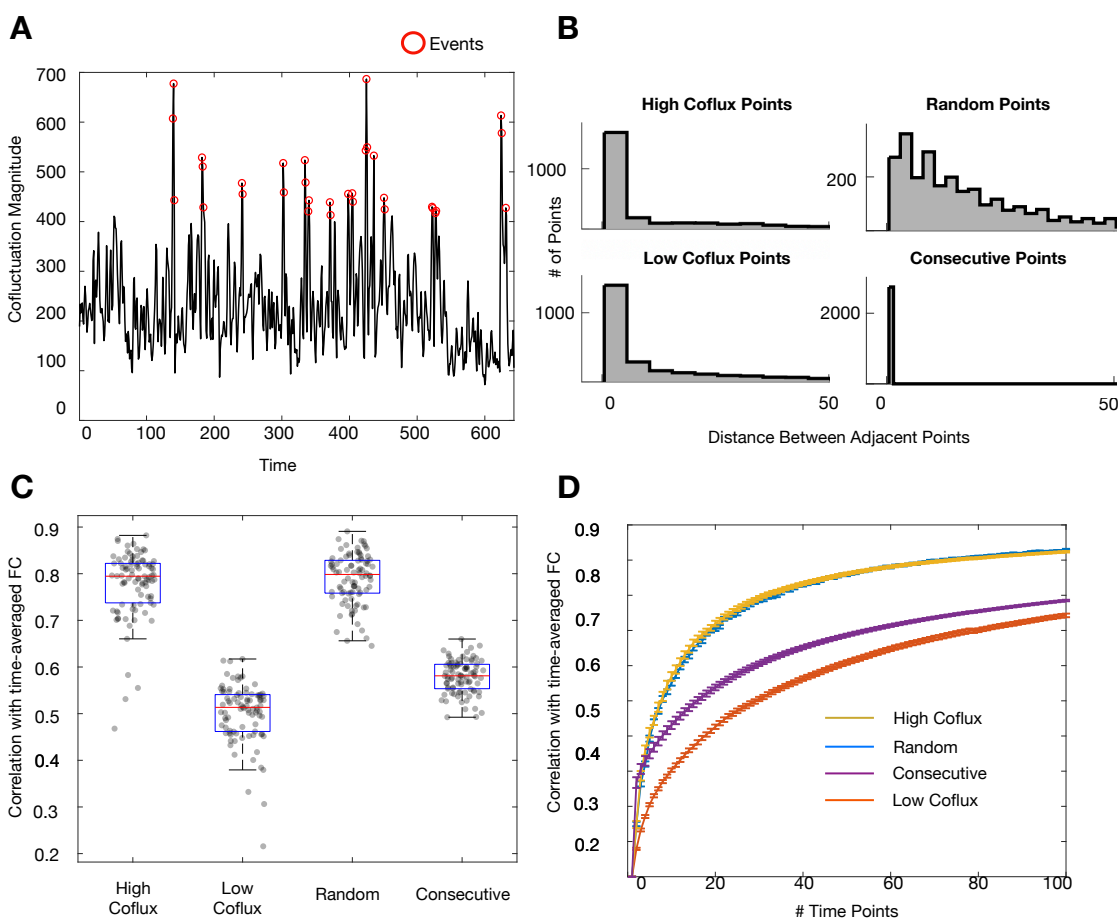

420  
 421 **Fig 3:** Effects of temporal spacing on estimating FC. (A) Events (red dots) are more temporally  
 422 spaced than consecutive points, shown here for MSC02 session 6. (B) Histograms of distance  
 423 between sampled points using consecutive, random, or cofluctuation-based sampling,  
 424 aggregated over all subjects and sessions. (C) Randomly sampled points are as similar to static  
 425 session FC as are events; both match static session FC much better than consecutive or low  
 426 cofluctuation points. (D) These relationships hold over a range of bin sizes. These results  
 427 suggest that temporal spacing is an important factor in estimating FC well.

428  
 429 **DISCUSSION**

430  
 431 In this study, we asked if “events”, time points with high BOLD cofluctuation, are discrete,  
 432 transient events that drive functional connectivity. We found that events are not discrete  
 433 phenomena driving FC. When they are removed, static FC structure is still present. Further,  
 434 there is a gradual positive relationship between network structure and cofluctuation amplitude,  
 435 with relatively similar behavior for the top 50% of timepoints, including events. Next, we asked if  
 436 this gradual relationship between network structure and cofluctuation could be explained by  
 437 sampling variability on static FC. We created a simulated data set matched to BOLD in  
 438 dimensionality and covariance structure. Our model produced the same gradual positive  
 439 relationship seen in real data, including the existence of extreme points like events, suggesting  
 440 that event behavior can be explained by sampling variability alone. Finally, we analyzed why  
 441 events are able to recreate static FC with so few points. We found that small numbers of  
 442 randomly sampled timepoints are also able reproduce static network structure well, suggesting

443 that both sampling variability and temporal spacing are important factors in estimating FC.  
444 Taken together, these results support the idea that while events are an especially good  
445 representation of the network structure present in static FC, there is not evidence that they are  
446 unique points driving it.

447

#### 448 **Should events be used to study the neural underpinnings of functional connectivity?**

449 Although there is a large literature linking fMRI BOLD signal to neural activity (Heeger et al.,  
450 2000; Logothetis et al., 2001), the physiological mechanism of FC itself is incompletely  
451 understood. Past work suggests that BOLD FC is constrained by structural connections (Honey  
452 et al., 2009; Johnston et al., 2008; Vincent et al., 2007) and is related to correlations in neural  
453 activity (Nir et al., 2008; Shmuel & Leopold, 2008; Vincent et al., 2007) but the underlying  
454 drivers of these spontaneous activity correlations remain relatively unknown. Because events  
455 contain similar functional connectivity patterns to static functional connectivity, it was suggested  
456 that these specific moments are responsible for functional connectivity measured over the  
457 timeseries (Esfahlani et al., 2020). From a research perspective, this would make them an  
458 excellent temporal target for investigating the neural mechanism of FC.

459

460 In this work, we show that while events do match static FC well, they are not discrete markers  
461 for it. When they are discarded, static FC structure is still strongly present in the remaining time  
462 points. Further, there is a gradual and increasing relationship between co-fluctuation amplitude  
463 and FC where many points (at least 50%) have a strong relationship with static FC. These  
464 results suggest that events by themselves do not (mechanistically)<sup>1</sup> drive FC and it is unlikely  
465 there is a unique physiological event happening at high co-fluctuation points which is creating the  
466 FC matrix. Given these observations, we consider it unlikely that investigating the unique  
467 temporal physiological activity coincident with events would glean additional new information  
468 about the physiologic origins of FC, beyond what might be seen at other timepoints as well.  
469 However, as events show a very strong relationship to FC structure, it is possible that their  
470 study may prove useful for denoising and analysis, to provide a higher signal to noise ratio for  
471 investigations of simultaneous BOLD and direct neural recordings.

472

#### 473 **Relationship between events and static vs. dynamic functional connectivity**

474 Interpretation of events largely depends on one's perspective about the temporal nature of FC.  
475 As has been summarized elsewhere (Lurie et al., 2020), there are two dominant perspectives  
476 on this topic. One perspective posits that functional connectivity exhibits meaningful temporal  
477 dynamics on a moment to moment basis which could represent differences in neural  
478 interactions related to ongoing cognition and task processing (Calhoun et al., 2014; R. M.  
479 Hutchison et al., 2013; Lurie et al., 2020). This view is supported by the fact that there are  
480 transient BOLD responses to tasks (Bandettini et al., 1992; Kwong et al., 1992; Ogawa et al.,  
481 1992), that states can be found in resting-state FC data at second and minute time scales using  
482 sliding windows or instantaneous coactivation patterns (Allen et al., 2014; Chang & Glover,  
483 2010; Petridou et al., 2013; Shakil et al., 2016), and that changes in state properties have been  
484 linked to task behavior, ongoing cognition, and arousal (Chang et al., 2016; Gonzalez-Castillo et  
485 al., 2015; M. R. Hutchison et al., 2013; Kucyi & Davis, 2014; Kupis et al., 2021; Sadaghiani et  
486 al., 2015; Tagliazucchi & Laufs, 2014) as well as more stable measures of cognitive/behavioral  
487 traits and psychiatric disease (Damaraju et al., 2014; de Lacy et al., 2017; Liégeois et al., 2019;  
488 Rashid et al., 2016). From this perspective, static FC is less significant than its constituent parts.

489

---

<sup>1</sup> Events do not appear to drive FC in a unique way but do contribute the most to FC estimates as a mathematical necessity of their definition and relationship with correlation.

490 The second perspective posits FC is temporally stable and primarily reflects a history of co-  
491 activation between regions (Laumann & Snyder, 2021). This is supported by evidence that  
492 functional connectivity patterns are consistent within people over sessions (Gratton et al., 2018;  
493 Laumann et al., 2015), only slightly altered during tasks (Cole et al., 2014; Gratton et al., 2016,  
494 2018), and present in anesthesia (Mhuirheartaigh et al., 2010) and slow wave sleep (Sämman  
495 et al., 2011). This perspective emphasizes that resting state FC patterns are only a weak  
496 marker of ongoing cognition, and are instead more related to stable neuroanatomical  
497 constraints, homeostatic processes, and learning related adaptations (Laumann & Snyder,  
498 2021). This perspective collides with the previous one in that it suggests that the dynamic states  
499 found during rest<sup>2</sup> may be explained by sampling variability, motion artifacts, and arousal  
500 (Hindriks et al., 2016; Hlinka & Hadrava, 2015b; Laumann et al., 2017; Liégeois et al., 2017)  
501 rather than current cognitive content or information processing. From this second perspective,  
502 the focus of resting state analysis is on finding a clean and reliable static FC measure that may  
503 be informative about brain organization.

504  
505 The information held in events, then, largely depends on which perspective one takes. From a  
506 dynamic FC states perspective, events help identify states and characterize their properties in a  
507 more temporally specific way. Indeed, events have been used to identify states within resting  
508 state fMRI (Sporns et al., 2021), states that differentiate people (Jo et al., 2021) and states  
509 related to variation in hormone concentrations within individuals across days (Greenwell et al.,  
510 2021). However, from a static FC perspective, events may instead reflect moments of randomly  
511 good representation of the static FC structure. From this view, the previous results could be  
512 interpreted as occurring because events are particularly good timepoints for identifying stable  
513 differences between people and stable static network structure that is relevant to hormonal  
514 neurobiology.

515  
516 Consistent with our findings, Novelli and Razi recently showed that many of the results of edge  
517 functional connectivity (eFC), including the presence of high amplitude co-fluctuations, can be  
518 derived from static FC alone (Novelli & Razi, 2021). We showed in this current work that  
519 presence of events and the gradual relationship between co-fluctuation and static FC is  
520 predictable from static FC too. While a more extended discussion of dynamic FC is outside the  
521 scope of this work, the results shown suggest that static FC and sampling variability are  
522 sufficient to explain the properties of high co-fluctuation timepoints during rest reported so far.  
523 This work alone does not eliminate the possibility of multiple diverse states within resting state  
524 FC. Other modeling work has shown that events arise from biophysical models built on  
525 structural connectivity and simulated spontaneous BOLD signal dynamics (Pope et al., 2021).  
526 However, the present work provides a parsimonious explanation for how events could arise  
527 from a stationary but noisy signal. We echo Novelli and Razi in our interest in future explorations  
528 of edge FC features which cannot be explained by static FC (Novelli & Razi, 2021).

### 529 530 **Practical considerations for fMRI functional connectivity analysis**

531 Beyond fundamental neurophysiological concerns related to FC, events could be useful for a  
532 range of practical applications in FC analysis. First, we wondered if events could be used to  
533 define a filter for data points particularly suited to FC analysis. And second, given that events  
534 are good at recapitulating static FC, we wondered if it would be possible to reduce data  
535 collection by inducing more event-like time points.

536

---

<sup>2</sup> Significant differences in dynamic FC states are seen with tasks, but they tend to be relatively small (Cole et al., 2014; Gratton et al., 2018; Laumann et al., 2017).

537 Traditionally, resting state FC analyses try to isolate relevant signal by identifying and extracting  
538 known artifacts (motion, respiration, etc.) and presuming the residual data is all equally useful  
539 (Power et al., 2020). Esfahlani and colleagues' result was particularly exciting because it  
540 suggested that, after addressing artifacts, the remaining data varied in utility for defining FC  
541 structure, with events providing a means to isolate the particularly useful components (Esfahlani  
542 et al., 2020). Although in this paper we showed that events can be explained as a consequence  
543 of sampling variability on static FC, this does not rule out that they may be a useful analytical  
544 tool. In fact, recent work has shown that ETS (edge-time-series) are better at identifying  
545 individuals than static FC (Jo et al., 2021). The strategy of seeking out points with maximal  
546 network information as a 'denoising' strategy is a paradigm shift in fMRI FC analysis and could  
547 be an exciting avenue of future study.

548  
549 The second question is whether the fact that events can recapitulate FC with few timepoints  
550 suggests that FC may be effectively measured through much shorter data collection regimes. It  
551 has become evident in recent years that it is possible to study functional brain organization at  
552 the individual level if enough data is collected (Braga & Buckner, 2017; Gordon et al., 2017;  
553 Laumann et al., 2015; Noble et al., 2017), with most papers suggesting more than 30 minutes of  
554 high quality resting-state data is needed to measure static cortical FC reliably. This has  
555 motivated significant ongoing efforts to collect large amounts of individual 'precision' data  
556 (Fedorenko, 2021; Gratton & Braga, 2021; Naselaris et al., 2021; Pritschet et al., 2021) which  
557 have led to novel findings, but are costly and time-intensive, and may be difficult to acquire in  
558 clinical or pediatric populations. We wondered if, because events contain more network  
559 structure information than other time points, one could decrease data collection by increasing  
560 the rate of events and focusing analysis solely on those moments. However, the results in this  
561 manuscript suggest that event correspondence to static FC can be explained by sampling  
562 variability and spaced sampling – suggesting it would be difficult to ensure a high proportion of  
563 events in a short amount of data collection time. We are optimistic about new strategies for  
564 decreasing data collection needs such as new MRI techniques (Lynch et al., 2020) and efforts  
565 to reduce artifacts (Power et al., 2020) to address these continued issues in fMRI data  
566 collection.

## 567 568 **Limitations**

569 We will close by noting some limitations in this work and opportunities for future research. First,  
570 we used a dataset collected from a small number of individuals. However, we showed that the  
571 results were very similar across each participant and sessions within participants (Fig. S1),  
572 suggesting robustness in these results. Second, when simulating BOLD data, we used a very  
573 simple model which accounted only for spatial correlation and included no BOLD-like temporal  
574 features (e.g., autocorrelation, matched spectral structure) (Cordes et al., 2001; He et al., 2010;  
575 Liégeois et al., 2021; Zarahn et al., 1997). However, this simple model still was able to produce  
576 event-like behavior, as was an even simpler toy model from sine-waves (Fig. S4). That even  
577 such simple models showed event-like behavior suggests that events arise based on simple  
578 properties of the BOLD timeseries. Third, we focused on resting-state fMRI data in this  
579 manuscript, rather than data from task sessions. We are curious about the effects of tasks on  
580 BOLD co-fluctuation: given that arousal and tasks can create real non-stationarities in BOLD  
581 data, we consider it possible that tasks and imposed states could change the prevalence and  
582 structure of events (Betz et al., 2020; Cole et al., 2014; Gratton et al., 2016, 2018; Laumann et  
583 al., 2017; Tagliazucchi & Laufs, 2014). Future work will be needed to fully explore this issue.

## 584 585 **Conclusions**

586 In this work, we investigated high co-fluctuation BOLD events and found evidence suggesting  
587 that, rather than events behaving as unique discrete timepoints that drive functional



588 connectivity, events may arise as an expected byproduct of a static functional network structure.  
589 Event recapitulation of network structure was not unique, but varied continuously across  
590 timepoints in real data, and was present in data from which events had been excluded.  
591 Simulations demonstrated similar responses from stationary signals. Finally, one of the primary  
592 interesting properties of events – that they can recreate static FC with a few points – is not  
593 unique and is driven in part by sampling rate. These results suggest that events are  
594 parsimoniously explained as a consequence of a highly correlated, modular, noisy signal  
595 (BOLD) and therefore might be better suited as methods for identifying good representations of  
596 static network structure than as a tool to investigate the mechanistic sources of functional  
597 connectivity.

598

## 599 **ACKNOWLEDGEMENTS**

600 Funding was provided by NIH grant R01MH118370 (CG), NSF CAREER2048066 (CG), the  
601 Washington University Intellectual and Developmental Disabilities Research Center Engelhardt  
602 Family Foundation Innovation Fund (BAS) and NIH T32NS047987 (DMS). This research was  
603 supported in part through the computational resources and staff contributions provided for the  
604 Quest high performance computing facility at Northwestern University which is jointly supported  
605 by the Office of the Provost, the Office for Research, and Northwestern University Information  
606 Technology.

607

## 608 **DECLARATIONS OF COMPETING INTERESTS**

609 None

610

## 611 **CITATION DIVERSITY STATEMENT**

612 Recent work in several fields of science has identified a bias in citation practices such that  
613 papers from women and other minority scholars are under-cited relative to the number of such  
614 papers in the field (Bertolero et al., 2020; Caplar et al., 2017; Chatterjee & Werner, 2021; Dion  
615 et al., 2018; Dworkin et al., 2020; Fulvio et al., 2021; Maliniak et al., 2013; Mitchell et al., 2013;  
616 Wang et al., 2021). Here we sought to proactively consider choosing references that reflect the  
617 diversity of the field in thought, form of contribution, gender, race, ethnicity, and other factors.  
618 First, we obtained the predicted gender of the first and last author of each reference by using  
619 databases that store the probability of a first name being carried by a woman (Dworkin et al.,  
620 2020; Zhou et al., 2020). By this measure (and excluding self-citations to the first and last  
621 authors of our current paper), our references contain 7.04% woman(first)/woman(last), 11.27%  
622 man/woman, 19.72% woman/man, and 61.97% man/man. This method is limited in that a)  
623 names, pronouns, and social media profiles used to construct the databases may not, in every  
624 case, be indicative of gender identity and b) it cannot account for intersex, non-binary, or  
625 transgender people. Second, we obtained predicted racial/ethnic category of the first and last  
626 author of each reference by databases that store the probability of a first and last name being  
627 carried by an author of color (Ambekar et al., 2009; Sood & Laohaprapanon, 2018). By this  
628 measure (and excluding self-citations), our references contain 8.93% author of color  
629 (first)/author of color(last), 12.55% white author/author of color, 28.74% author of color/white  
630 author, and 49.78% white author/white author. This method is limited in that a) names and  
631 Florida Voter Data to make the predictions may not be indicative of racial/ethnic identity, and b)  
632 it cannot account for Indigenous and mixed-race authors, or those who may face differential  
633 biases due to the ambiguous racialization or ethnicization of their names. We look forward to  
634 future work that could help us to better understand how to support equitable practices in  
635 science.

636

## 637 **REFERENCES**



- 638 Allen, E. A., Damaraju, E., Plis, S. M., Erhardt, E. B., Eichele, T., & Calhoun, V. D. (2014).  
639 Tracking whole-brain connectivity dynamics in the resting state. *Cerebral Cortex (New*  
640 *York, N.Y.: 1991)*, 24(3), 663–676. <https://doi.org/10.1093/cercor/bhs352>
- 641 Ambekar, A., Ward, C., Mohammed, J., Male, S., & Skiena, S. (2009). Name-ethnicity  
642 classification from open sources. *Proceedings of the 15th ACM SIGKDD International*  
643 *Conference on Knowledge Discovery and Data Mining*, 49–58.  
644 <https://doi.org/10.1145/1557019.1557032>
- 645 Bandettini, P. A., Wong, E. C., Hinks, R. S., Tikofsky, R. S., & Hyde, J. S. (1992). Time course  
646 EPI of human brain function during task activation. *Magnetic Resonance in Medicine*,  
647 25(2), 390–397. <https://doi.org/10.1002/mrm.1910250220>
- 648 Bertolero, M., Dworkin, J., David, S., Llorede, C. L., Srivastava, P., Stiso, J., Zhou, D., Dzirasa,  
649 K., Fair, D., Kaczkurkin, A., Marlin, B. J., Shohamy, D., Uddin, L., Zurn, P., & Bassett, D.  
650 (2020). *Racial and ethnic imbalance in neuroscience reference lists and intersections*  
651 *with gender*. <https://doi.org/10.1101/2020.10.12.336230>
- 652 Betzel, R. F., Byrge, L., Esfahlani, F. Z., & Kennedy, D. P. (2020). Temporal fluctuations in the  
653 brain’s modular architecture during movie-watching. *NeuroImage*, 213, 116687.  
654 <https://doi.org/10.1016/j.neuroimage.2020.116687>
- 655 Bijsterbosch, J. D., Woolrich, M. W., Glasser, M. F., Robinson, E. C., Beckmann, C. F., Van  
656 Essen, D. C., Harrison, S. J., & Smith, S. M. (2018). The relationship between spatial  
657 configuration and functional connectivity of brain regions. *ELife*, 7, e32992.  
658 <https://doi.org/10.7554/eLife.32992>
- 659 Biswal, B., Yetkin, F. Z., Haughton, V. M., & Hyde, J. S. (1995). Functional connectivity in the  
660 motor cortex of resting human brain using echo-planar MRI. *Magnetic Resonance in*  
661 *Medicine*, 34(4), 537–541. <https://doi.org/10.1002/mrm.1910340409>
- 662 Braga, R. M., & Buckner, R. L. (2017). Parallel Interdigitated Distributed Networks within the  
663 Individual Estimated by Intrinsic Functional Connectivity. *Neuron*, 95(2), 457–471.e5.  
664 <https://doi.org/10.1016/j.neuron.2017.06.038>
- 665 Braga, R. M., DiNicola, L. M., Becker, H. C., & Buckner, R. L. (2020). Situating the left-  
666 lateralized language network in the broader organization of multiple specialized large-  
667 scale distributed networks. *Journal of Neurophysiology*, 124(5), 1415–1448.  
668 <https://doi.org/10.1152/jn.00753.2019>
- 669 Calhoun, V. D., Miller, R., Pearlson, G., & Adali, T. (2014). The chronnectome: Time-varying  
670 connectivity networks as the next frontier in fMRI data discovery. *Neuron*, 84(2), 262–  
671 274. <https://doi.org/10.1016/j.neuron.2014.10.015>
- 672 Caplar, N., Tacchella, S., & Birrer, S. (2017). Quantitative evaluation of gender bias in  
673 astronomical publications from citation counts. *Nature Astronomy*, 1(6), 0141.  
674 <https://doi.org/10.1038/s41550-017-0141>
- 675 Chang, C., & Glover, G. H. (2010). Time–frequency dynamics of resting-state brain connectivity  
676 measured with fMRI. *NeuroImage*, 50(1), 81–98.  
677 <https://doi.org/10.1016/j.neuroimage.2009.12.011>
- 678 Chang, C., Leopold, D. A., Schölvinck, M. L., Mandelkow, H., Picchioni, D., Liu, X., Ye, F. Q.,  
679 Turchi, J. N., & Duyn, J. H. (2016). Tracking brain arousal fluctuations with fMRI.  
680 *Proceedings of the National Academy of Sciences*, 113(16), 4518–4523.  
681 <https://doi.org/10.1073/pnas.1520613113>
- 682 Chatterjee, P., & Werner, R. M. (2021). Gender Disparity in Citations in High-Impact Journal  
683 Articles. *JAMA Network Open*, 4(7), e2114509.  
684 <https://doi.org/10.1001/jamanetworkopen.2021.14509>
- 685 Cole, M. W., Bassett, D. S., Power, J. D., Braver, T. S., & Petersen, S. E. (2014). Intrinsic and  
686 task-evoked network architectures of the human brain. *Neuron*, 83(1), 238–251.  
687 <https://doi.org/10.1016/j.neuron.2014.05.014>

- 688 Cordes, D., Haughton, V. M., Arfanakis, K., Carew, J. D., Turski, P. A., Moritz, C. H., Quigley,  
689 M. A., & Meyerand, E. (2001). Frequencies contributing to functional connectivity in the  
690 cerebral cortex in “resting-state” data. *AJNR. American Journal of Neuroradiology*, 22(7),  
691 1326–1333.
- 692 Dale, A. M., Fischl, B., & Sereno, M. I. (1999). Cortical Surface-Based Analysis: I. Segmentation  
693 and Surface Reconstruction. *NeuroImage*, 9(2), 179–194.  
694 <https://doi.org/10.1006/nimg.1998.0395>
- 695 Damaraju, E., Allen, E. A., Belger, A., Ford, J. M., McEwen, S., Mathalon, D. H., Mueller, B. A.,  
696 Pearlson, G. D., Potkin, S. G., Preda, A., Turner, J. A., Vaidya, J. G., van Erp, T. G., &  
697 Calhoun, V. D. (2014). Dynamic functional connectivity analysis reveals transient states  
698 of dysconnectivity in schizophrenia. *NeuroImage: Clinical*, 5, 298–308.  
699 <https://doi.org/10.1016/j.nicl.2014.07.003>
- 700 de Lacy, N., Doherty, D., King, B. H., Rachakonda, S., & Calhoun, V. D. (2017). Disruption to  
701 control network function correlates with altered dynamic connectivity in the wider autism  
702 spectrum. *NeuroImage: Clinical*, 15, 513–524. <https://doi.org/10.1016/j.nicl.2017.05.024>
- 703 Dion, M. L., Sumner, J. L., & Mitchell, S. M. L. (2018). Gendered Citation Patterns across  
704 Political Science and Social Science Methodology Fields. *Political Analysis*, 26(3), 312–  
705 327. <https://doi.org/10.1017/pan.2018.12>
- 706 Dworkin, J. D., Linn, K. A., Teich, E. G., Zurn, P., Shinohara, R. T., & Bassett, D. S. (2020). The  
707 extent and drivers of gender imbalance in neuroscience reference lists. *Nature  
708 Neuroscience*, 23(8), 918–926. <https://doi.org/10.1038/s41593-020-0658-y>
- 709 Esfahlani, F. Z., Byrge, L., Tanner, J., Sporns, O., Kennedy, D. P., & Betzel, R. F. (2021). *Edge-  
710 centric analysis of time-varying functional brain networks with applications in autism  
711 spectrum disorder* (p. 2021.07.01.450812). <https://doi.org/10.1101/2021.07.01.450812>
- 712 Esfahlani, F. Z., Jo, Y., Faskowitz, J., Byrge, L., Kennedy, D. P., Sporns, O., & Betzel, R. F.  
713 (2020). High-amplitude cofluctuations in cortical activity drive functional connectivity.  
714 *Proceedings of the National Academy of Sciences of the United States of America*,  
715 117(45), 28393–28401. <https://doi.org/10.1073/pnas.2005531117>
- 716 Fair, D. A., Miranda-Dominguez, O., Snyder, A. Z., Perrone, A., Earl, E. A., Van, A. N., Koller, J.  
717 M., Feczko, E., Tisdall, M. D., van der Kouwe, A., Klein, R. L., Mirro, A. E., Hampton, J.  
718 M., Adeyemo, B., Laumann, T. O., Gratton, C., Greene, D. J., Schlaggar, B. L., Hagler,  
719 D. J., ... Dosenbach, N. U. F. (2020). Correction of respiratory artifacts in MRI head  
720 motion estimates. *NeuroImage*, 208, 116400.  
721 <https://doi.org/10.1016/j.neuroimage.2019.116400>
- 722 Fedorenko, E. (2021). The early origins and the growing popularity of the individual-subject  
723 analytic approach in human neuroscience. *Current Opinion in Behavioral Sciences*, 40,  
724 105–112. <https://doi.org/10.1016/j.cobeha.2021.02.023>
- 725 Fulvio, J. M., Akinnola, I., & Postle, B. R. (2021). Gender (Im)balance in Citation Practices in  
726 Cognitive Neuroscience. *Journal of Cognitive Neuroscience*, 33(1), 3–7.  
727 [https://doi.org/10.1162/jocn\\_a\\_01643](https://doi.org/10.1162/jocn_a_01643)
- 728 Glasser, M. F., Sotiropoulos, S. N., Wilson, J. A., Coalson, T. S., Fischl, B., Andersson, J. L.,  
729 Xu, J., Jbabdi, S., Webster, M., Polimeni, J. R., Van Essen, D. C., & Jenkinson, M.  
730 (2013). The minimal preprocessing pipelines for the Human Connectome Project.  
731 *NeuroImage*, 80, 105–124. <https://doi.org/10.1016/j.neuroimage.2013.04.127>
- 732 Gonzalez-Castillo, J., Hoy, C. W., Handwerker, D. A., Robinson, M. E., Buchanan, L. C., Saad,  
733 Z. S., & Bandettini, P. A. (2015). Tracking ongoing cognition in individuals using brief,  
734 whole-brain functional connectivity patterns. *Proceedings of the National Academy of  
735 Sciences*, 112(28), 8762–8767. <https://doi.org/10.1073/pnas.1501242112>
- 736 Gordon, E. M., Laumann, T. O., Adeyemo, B., Huckins, J. F., Kelley, W. M., & Petersen, S. E.  
737 (2016). Generation and Evaluation of a Cortical Area Parcellation from Resting-State

- 738 Correlations. *Cerebral Cortex (New York, N.Y.: 1991)*, 26(1), 288–303.  
739 <https://doi.org/10.1093/cercor/bhu239>
- 740 Gordon, E. M., Laumann, T. O., Gilmore, A. W., Newbold, D. J., Greene, D. J., Berg, J. J.,  
741 Ortega, M., Hoyt-Drazen, C., Gratton, C., Sun, H., Hampton, J. M., Coalson, R. S.,  
742 Nguyen, A. L., McDermott, K. B., Shimony, J. S., Snyder, A. Z., Schlaggar, B. L.,  
743 Petersen, S. E., Nelson, S. M., & Dosenbach, N. U. F. (2017). Precision Functional  
744 Mapping of Individual Human Brains. *Neuron*, 95(4), 791-807.e7.  
745 <https://doi.org/10.1016/j.neuron.2017.07.011>
- 746 Gratton, C., & Braga, R. M. (2021). Editorial overview: Deep imaging of the individual brain:  
747 past, practice, and promise. *Current Opinion in Behavioral Sciences*, 40, iii–vi.  
748 <https://doi.org/10.1016/j.cobeha.2021.06.011>
- 749 Gratton, C., Laumann, T. O., Gordon, E. M., Adeyemo, B., & Petersen, S. E. (2016). Evidence  
750 for Two Independent Factors that Modify Brain Networks to Meet Task Goals. *Cell*  
751 *Reports*, 17(5), 1276–1288. <https://doi.org/10.1016/j.celrep.2016.10.002>
- 752 Gratton, C., Laumann, T. O., Nielsen, A. N., Greene, D. J., Gordon, E. M., Gilmore, A. W.,  
753 Nelson, S. M., Coalson, R. S., Snyder, A. Z., Schlaggar, B. L., Dosenbach, N. U. F., &  
754 Petersen, S. E. (2018). Functional Brain Networks Are Dominated by Stable Group and  
755 Individual Factors, Not Cognitive or Daily Variation. *Neuron*, 98(2), 439-452.e5.  
756 <https://doi.org/10.1016/j.neuron.2018.03.035>
- 757 Greenwell, S., Faskowitz, J., Pritschet, L., Santander, T., Jacobs, E. G., & Betzel, R. F. (2021a).  
758 *High-amplitude network co-fluctuations linked to variation in hormone concentrations*  
759 *over menstrual cycle* (p. 2021.07.29.453892). <https://doi.org/10.1101/2021.07.29.453892>
- 760 Greenwell, S., Faskowitz, J., Pritschet, L., Santander, T., Jacobs, E. G., & Betzel, R. F. (2021b).  
761 *High-amplitude network co-fluctuations linked to variation in hormone concentrations*  
762 *over menstrual cycle* (p. 2021.07.29.453892). <https://doi.org/10.1101/2021.07.29.453892>
- 763 He, B. J., Zempel, J. M., Snyder, A. Z., & Raichle, M. E. (2010). The temporal structures and  
764 functional significance of scale-free brain activity. *Neuron*, 66(3), 353–369.  
765 <https://doi.org/10.1016/j.neuron.2010.04.020>
- 766 Heeger, D. J., Huk, A. C., Geisler, W. S., & Albrecht, D. G. (2000). Spikes versus BOLD: What  
767 does neuroimaging tell us about neuronal activity? *Nature Neuroscience*, 3(7), 631–633.  
768 <https://doi.org/10.1038/76572>
- 769 Hindriks, R., Adhikari, M. H., Murayama, Y., Ganzetti, M., Mantini, D., Logothetis, N. K., & Deco,  
770 G. (2016). Can sliding-window correlations reveal dynamic functional connectivity in  
771 resting-state fMRI? *NeuroImage*, 127, 242–256.  
772 <https://doi.org/10.1016/j.neuroimage.2015.11.055>
- 773 Hlinka, J., & Hadrava, M. (2015a). On the danger of detecting network states in white noise.  
774 *Frontiers in Computational Neuroscience*, 9, 11.  
775 <https://doi.org/10.3389/fncom.2015.00011>
- 776 Hlinka, J., & Hadrava, M. (2015b). On the danger of detecting network states in white noise.  
777 *Frontiers in Computational Neuroscience*, 9, 11.  
778 <https://doi.org/10.3389/fncom.2015.00011>
- 779 Honey, C. J., Sporns, O., Cammoun, L., Gigandet, X., Thiran, J. P., Meuli, R., & Hagmann, P.  
780 (2009). Predicting human resting-state functional connectivity from structural  
781 connectivity. *Proceedings of the National Academy of Sciences*, 106(6), 2035–2040.  
782 <https://doi.org/10.1073/pnas.0811168106>
- 783 Hutchison, M. R., Womelsdorf, T., Gati, J. S., Everling, S., & Menon, R. S. (2013). Resting-state  
784 networks show dynamic functional connectivity in awake humans and anesthetized  
785 macaques. *Human Brain Mapping*, 34(9), 2154–2177.  
786 <https://doi.org/10.1002/hbm.22058>
- 787 Hutchison, R. M., Womelsdorf, T., Allen, E. A., Bandettini, P. A., Calhoun, V. D., Corbetta, M.,  
788 Della Penna, S., Duyn, J. H., Glover, G. H., Gonzalez-Castillo, J., Handwerker, D. A.,

- 789 Keilholz, S., Kiviniemi, V., Leopold, D. A., de Pasquale, F., Sporns, O., Walter, M., &  
790 Chang, C. (2013). Dynamic functional connectivity: Promise, issues, and interpretations.  
791 *NeuroImage*, 80, 360–378. <https://doi.org/10.1016/j.neuroimage.2013.05.079>
- 792 Jo, Y., Faskowitz, J., Esfahlani, F. Z., Sporns, O., & Betzel, R. F. (2021). Subject identification  
793 using edge-centric functional connectivity. *NeuroImage*, 238, 118204.  
794 <https://doi.org/10.1016/j.neuroimage.2021.118204>
- 795 Johnston, J. M., Vaishnavi, S. N., Smyth, M. D., Zhang, D., He, B. J., Zempel, J. M., Shimony, J.  
796 S., Snyder, A. Z., & Raichle, M. E. (2008). Loss of Resting Interhemispheric Functional  
797 Connectivity after Complete Section of the Corpus Callosum. *Journal of Neuroscience*,  
798 28(25), 6453–6458. <https://doi.org/10.1523/JNEUROSCI.0573-08.2008>
- 799 Kong, R., Li, J., Orban, C., Sabuncu, M. R., Liu, H., Schaefer, A., Sun, N., Zuo, X.-N., Holmes,  
800 A. J., Eickhoff, S. B., & Yeo, B. T. T. (2019). Spatial Topography of Individual-Specific  
801 Cortical Networks Predicts Human Cognition, Personality, and Emotion. *Cerebral Cortex*  
802 (*New York, N.Y.: 1991*), 29(6), 2533–2551. <https://doi.org/10.1093/cercor/bhy123>
- 803 Kucyi, A., & Davis, K. D. (2014). Dynamic functional connectivity of the default mode network  
804 tracks daydreaming. *NeuroImage*, 100, 471–480.  
805 <https://doi.org/10.1016/j.neuroimage.2014.06.044>
- 806 Kupis, L., Goodman, Z. T., Kornfeld, S., Hoang, S., Romero, C., Dirks, B., Dehoney, J., Chang,  
807 C., Spreng, R. N., Nomi, J. S., & Uddin, L. Q. (2021). Brain Dynamics Underlying  
808 Cognitive Flexibility Across the Lifespan. *Cerebral Cortex*, 31(11), 5263–5274.  
809 <https://doi.org/10.1093/cercor/bhab156>
- 810 Kwong, K. K., Belliveau, J. W., Chesler, D. A., Goldberg, I. E., Weisskoff, R. M., Poncelet, B. P.,  
811 Kennedy, D. N., Hoppel, B. E., Cohen, M. S., & Turner, R. (1992). Dynamic magnetic  
812 resonance imaging of human brain activity during primary sensory stimulation.  
813 *Proceedings of the National Academy of Sciences*, 89(12), 5675–5679.  
814 <https://doi.org/10.1073/pnas.89.12.5675>
- 815 Laumann, T. O., Gordon, E. M., Adeyemo, B., Snyder, A. Z., Joo, S. J., Chen, M.-Y., Gilmore,  
816 A. W., McDermott, K. B., Nelson, S. M., Dosenbach, N. U. F., Schlaggar, B. L., Mumford,  
817 J. A., Poldrack, R. A., & Petersen, S. E. (2015). Functional System and Areal  
818 Organization of a Highly Sampled Individual Human Brain. *Neuron*, 87(3), 657–670.  
819 <https://doi.org/10.1016/j.neuron.2015.06.037>
- 820 Laumann, T. O., & Snyder, A. Z. (2021). Brain activity is not only for thinking. *Current Opinion in*  
821 *Behavioral Sciences*, 40, 130–136. <https://doi.org/10.1016/j.cobeha.2021.04.002>
- 822 Laumann, T. O., Snyder, A. Z., Mitra, A., Gordon, E. M., Gratton, C., Adeyemo, B., Gilmore, A.  
823 W., Nelson, S. M., Berg, J. J., Greene, D. J., McCarthy, J. E., Tagliazucchi, E., Laufs, H.,  
824 Schlaggar, B. L., Dosenbach, N. U. F., & Petersen, S. E. (2017). On the Stability of  
825 BOLD fMRI Correlations. *Cerebral Cortex (New York, N.Y.: 1991)*, 27(10), 4719–4732.  
826 <https://doi.org/10.1093/cercor/bhw265>
- 827 Liégeois, R., Laumann, T. O., Snyder, A. Z., Zhou, J., & Yeo, B. T. T. (2017). Interpreting  
828 temporal fluctuations in resting-state functional connectivity MRI. *NeuroImage*, 163,  
829 437–455. <https://doi.org/10.1016/j.neuroimage.2017.09.012>
- 830 Liégeois, R., Li, J., Kong, R., Orban, C., Van De Ville, D., Ge, T., Sabuncu, M. R., & Yeo, B. T.  
831 T. (2019). Resting brain dynamics at different timescales capture distinct aspects of  
832 human behavior. *Nature Communications*, 10(1), 2317. <https://doi.org/10.1038/s41467-019-10317-7>
- 833 Liégeois, R., Yeo, B. T. T., & Van De Ville, D. (2021). Interpreting null models of resting-state  
834 functional MRI dynamics: Not throwing the model out with the hypothesis. *NeuroImage*,  
835 243, 118518. <https://doi.org/10.1016/j.neuroimage.2021.118518>
- 836 Logothetis, N. K., Pauls, J., Augath, M., Trinath, T., & Oeltermann, A. (2001).  
837 Neurophysiological investigation of the basis of the fMRI signal. *Nature*, 412(6843), 150–  
838 157. <https://doi.org/10.1038/35084005>
- 839



- 840 Lurie, D. J., Kessler, D., Bassett, D. S., Betzel, R. F., Breakspear, M., Kheilholz, S., Kucyi, A.,  
841 Liégeois, R., Lindquist, M. A., McIntosh, A. R., Poldrack, R. A., Shine, J. M., Thompson,  
842 W. H., Bielczyk, N. Z., Douw, L., Kraft, D., Miller, R. L., Muthuraman, M., Pasquini, L., ...  
843 Calhoun, V. D. (2020). Questions and controversies in the study of time-varying  
844 functional connectivity in resting fMRI. *Network Neuroscience (Cambridge, Mass.)*, 4(1),  
845 30–69. [https://doi.org/10.1162/netn\\_a\\_00116](https://doi.org/10.1162/netn_a_00116)
- 846 Lynch, C. J., Power, J. D., Scult, M. A., Dubin, M., Gunning, F. M., & Liston, C. (2020). Rapid  
847 Precision Functional Mapping of Individuals Using Multi-Echo fMRI. *Cell Reports*, 33(12),  
848 108540. <https://doi.org/10.1016/j.celrep.2020.108540>
- 849 Maliniak, D., Powers, R., & Walter, B. F. (2013). The Gender Citation Gap in International  
850 Relations. *International Organization*, 67(4), 889–922.  
851 <https://doi.org/10.1017/S0020818313000209>
- 852 Marcus, D. S., Harwell, J., Olsen, T., Hodge, M., Glasser, M. F., Prior, F., Jenkinson, M.,  
853 Laumann, T., Curtiss, S. W., & Van Essen, D. C. (2011). Informatics and data mining  
854 tools and strategies for the human connectome project. *Frontiers in Neuroinformatics*, 5.  
855 Scopus. <https://doi.org/10.3389/fninf.2011.00004>
- 856 Mhuircheartaigh, R. N., Rosenorn-Lanng, D., Wise, R., Jbabdi, S., Rogers, R., & Tracey, I.  
857 (2010). Cortical and subcortical connectivity changes during decreasing levels of  
858 consciousness in humans: A functional magnetic resonance imaging study using  
859 propofol. *The Journal of Neuroscience: The Official Journal of the Society for*  
860 *Neuroscience*, 30(27), 9095–9102. <https://doi.org/10.1523/JNEUROSCI.5516-09.2010>
- 861 Mitchell, S. M., Lange, S., & Brus, H. (2013). Gendered Citation Patterns in International  
862 Relations Journals. *International Studies Perspectives*, 14(4), 485–492.  
863 <https://doi.org/10.1111/insp.12026>
- 864 Naselaris, T., Allen, E., & Kay, K. (2021). Extensive sampling for complete models of individual  
865 brains. *Current Opinion in Behavioral Sciences*, 40, 45–51.  
866 <https://doi.org/10.1016/j.cobeha.2020.12.008>
- 867 Newman, M., & Girvan, M. (2004). Finding and evaluating community structure in networks.  
868 *Physical Review E*, 69(2), 026113. <https://doi.org/10.1103/PhysRevE.69.026113>
- 869 Nir, Y., Mukamel, R., Dinstein, I., Privman, E., Harel, M., Fisch, L., Gelbard-Sagiv, H.,  
870 Kipervasser, S., Andelman, F., Neufeld, M. Y., Kramer, U., Arieli, A., Fried, I., & Malach,  
871 R. (2008). Interhemispheric correlations of slow spontaneous neuronal fluctuations  
872 revealed in human sensory cortex. *Nature Neuroscience*, 11(9), 1100–1108.  
873 <https://doi.org/10.1038/nn.2177>
- 874 Noble, S., Spann, M. N., Tokoglu, F., Shen, X., Constable, R. T., & Scheinost, D. (2017).  
875 Influences on the Test-Retest Reliability of Functional Connectivity MRI and its  
876 Relationship with Behavioral Utility. *Cerebral Cortex (New York, N.Y.: 1991)*, 27(11),  
877 5415–5429. <https://doi.org/10.1093/cercor/bhx230>
- 878 Novelli, L., & Razi, A. (2021). A mathematical perspective on edge-centric functional  
879 connectivity. *ArXiv:2106.10631 [Physics, q-Bio]*. <http://arxiv.org/abs/2106.10631>
- 880 Ogawa, S., Tank, D. W., Menon, R., Ellermann, J. M., Kim, S. G., Merkle, H., & Ugurbil, K.  
881 (1992). Intrinsic signal changes accompanying sensory stimulation: Functional brain  
882 mapping with magnetic resonance imaging. *Proceedings of the National Academy of*  
883 *Sciences*, 89(13), 5951–5955. <https://doi.org/10.1073/pnas.89.13.5951>
- 884 Petridou, N., Gaudes, C. C., Dryden, I. L., Francis, S. T., & Gowland, P. A. (2013). Periods of  
885 rest in fMRI contain individual spontaneous events which are related to slowly fluctuating  
886 spontaneous activity. *Human Brain Mapping*, 34(6), 1319–1329.  
887 <https://doi.org/10.1002/hbm.21513>
- 888 Pope, M., Fukushima, M., Betzel, R. F., & Sporns, O. (2021). *Modular origins of high-amplitude*  
889 *co-fluctuations in fine-scale functional connectivity dynamics* [Preprint]. *Neuroscience*.  
890 <https://doi.org/10.1101/2021.05.16.444357>

- 891 Power, J. D., Cohen, A. L., Nelson, S. M., Wig, G. S., Barnes, K. A., Church, J. A., Vogel, A. C.,  
892 Laumann, T. O., Miezin, F. M., Schlaggar, B. L., & Petersen, S. E. (2011). Functional  
893 network organization of the human brain. *Neuron*, *72*(4), 665–678.  
894 <https://doi.org/10.1016/j.neuron.2011.09.006>
- 895 Power, J. D., Lynch, C. J., Adeyemo, B., & Petersen, S. E. (2020). A Critical, Event-Related  
896 Appraisal of Denoising in Resting-State fMRI Studies. *Cerebral Cortex (New York, N.Y.:  
897 1991)*, *30*(10), 5544–5559. <https://doi.org/10.1093/cercor/bhaa139>
- 898 Power, J. D., Mitra, A., Laumann, T. O., Snyder, A. Z., Schlaggar, B. L., & Petersen, S. E.  
899 (2014). Methods to detect, characterize, and remove motion artifact in resting state fMRI.  
900 *NeuroImage*, *84*, 320–341. <https://doi.org/10.1016/j.neuroimage.2013.08.048>
- 901 Pritschet, L., Taylor, C. M., Santander, T., & Jacobs, E. G. (2021). Applying dense-sampling  
902 methods to reveal dynamic endocrine modulation of the nervous system. *Current  
903 Opinion in Behavioral Sciences*, *40*, 72–78. <https://doi.org/10.1016/j.cobeha.2021.01.012>
- 904 Rashid, B., Arbabshirani, M. R., Damaraju, E., Cetin, M. S., Miller, R., Pearlson, G. D., &  
905 Calhoun, V. D. (2016). Classification of schizophrenia and bipolar patients using static  
906 and dynamic resting-state fMRI brain connectivity. *NeuroImage*, *134*, 645–657.  
907 <https://doi.org/10.1016/j.neuroimage.2016.04.051>
- 908 Sadaghiani, S., Poline, J.-B., Kleinschmidt, A., & D'Esposito, M. (2015). Ongoing dynamics in  
909 large-scale functional connectivity predict perception. *Proceedings of the National  
910 Academy of Sciences*, *112*(27), 8463–8468. <https://doi.org/10.1073/pnas.1420687112>
- 911 Sämann, P. G., Wehrle, R., Hoehn, D., Spormaker, V. I., Peters, H., Tully, C., Holsboer, F., &  
912 Czisch, M. (2011). Development of the brain's default mode network from wakefulness  
913 to slow wave sleep. *Cerebral Cortex (New York, N.Y.: 1991)*, *21*(9), 2082–2093.  
914 <https://doi.org/10.1093/cercor/bhq295>
- 915 Seitzman, B. A., Gratton, C., Laumann, T. O., Gordon, E. M., Adeyemo, B., Dworesky, A.,  
916 Kraus, B. T., Gilmore, A. W., Berg, J. J., Ortega, M., Nguyen, A., Greene, D. J.,  
917 McDermott, K. B., Nelson, S. M., Lessov-Schlaggar, C. N., Schlaggar, B. L., Dosenbach,  
918 N. U. F., & Petersen, S. E. (2019). Trait-like variants in human functional brain networks.  
919 *Proceedings of the National Academy of Sciences*, *116*(45), 22851–22861.  
920 <https://doi.org/10.1073/pnas.1902932116>
- 921 Shakil, S., Lee, C.-H., & Keilholz, S. D. (2016). Evaluation of sliding window correlation  
922 performance for characterizing dynamic functional connectivity and brain states.  
923 *NeuroImage*, *133*, 111–128. <https://doi.org/10.1016/j.neuroimage.2016.02.074>
- 924 Shmuel, A., & Leopold, D. A. (2008). Neuronal correlates of spontaneous fluctuations in fMRI  
925 signals in monkey visual cortex: Implications for functional connectivity at rest. *Human  
926 Brain Mapping*, *29*(7), 751–761. <https://doi.org/10.1002/hbm.20580>
- 927 Smith, S. M., Fox, P. T., Miller, K. L., Glahn, D. C., Fox, P. M., Mackay, C. E., Filippini, N.,  
928 Watkins, K. E., Toro, R., Laird, A. R., & Beckmann, C. F. (2009). Correspondence of the  
929 brain's functional architecture during activation and rest. *Proceedings of the National  
930 Academy of Sciences*, *106*(31), 13040–13045. <https://doi.org/10.1073/pnas.0905267106>
- 931 Smith, S. M., Nichols, T. E., Vidaurre, D., Winkler, A. M., Behrens, T. E. J., Glasser, M. F.,  
932 Ugurbil, K., Barch, D. M., Van Essen, D. C., & Miller, K. L. (2015). A positive-negative  
933 mode of population covariation links brain connectivity, demographics and behavior.  
934 *Nature Neuroscience*, *18*(11), 1565–1567. <https://doi.org/10.1038/nn.4125>
- 935 Sood, G., & Laohaprapanon, S. (2018). Predicting Race and Ethnicity From the Sequence of  
936 Characters in a Name. *ArXiv:1805.02109 [Stat]*. <http://arxiv.org/abs/1805.02109>
- 937 Sporns, O., Faskowitz, J., Teixeira, A. S., Cutts, S. A., & Betzel, R. F. (2021). Dynamic  
938 expression of brain functional systems disclosed by fine-scale analysis of edge time  
939 series. *Network Neuroscience (Cambridge, Mass.)*, *5*(2), 405–433.  
940 [https://doi.org/10.1162/netn\\_a\\_00182](https://doi.org/10.1162/netn_a_00182)



- 941 Tagliazucchi, E., & Laufs, H. (2014). Decoding wakefulness levels from typical fMRI resting-  
942 state data reveals reliable drifts between wakefulness and sleep. *Neuron*, 82(3), 695–  
943 708. <https://doi.org/10.1016/j.neuron.2014.03.020>
- 944 Tavor, I., Jones, O. P., Mars, R. B., Smith, S. M., Behrens, T. E., & Jbabdi, S. (2016). Task-free  
945 MRI predicts individual differences in brain activity during task performance. *Science*,  
946 352(6282), 216–220. <https://doi.org/10.1126/science.aad8127>
- 947 van den Heuvel, M. P., Stam, C. J., Kahn, R. S., & Hulshoff Pol, H. E. (2009). Efficiency of  
948 functional brain networks and intellectual performance. *The Journal of Neuroscience: The Official Journal of the Society for Neuroscience*, 29(23), 7619–7624.  
949 <https://doi.org/10.1523/JNEUROSCI.1443-09.2009>
- 951 Vincent, J.-L., Patel, G. H., Fox, M. D., Snyder, A. Z., Baker, J. T., Van Essen, D. C., Zempel, J.  
952 M., Snyder, L. H., Corbetta, M., & Raichle, M. E. (2007). Intrinsic functional architecture  
953 in the anaesthetized monkey brain. *Nature*, 447(7140), 83–86.  
954 <https://doi.org/10.1038/nature05758>
- 955 Wang, X., Dworkin, J. D., Zhou, D., Stiso, J., Falk, E. B., Bassett, D. S., Zurn, P., & Lydon-  
956 Staley, D. M. (2021). Gendered citation practices in the field of communication. *Annals*  
957 *of the International Communication Association*, 45(2), 134–153.  
958 <https://doi.org/10.1080/23808985.2021.1960180>
- 959 Yeo, B. T., Krienen, F. M., Sepulcre, J., Sabuncu, M. R., Lashkari, D., Hollinshead, M., Roffman,  
960 J. L., Smoller, J. W., Zöllei, L., Polimeni, J. R., Fischl, B., Liu, H., & Buckner, R. L.  
961 (2011). The organization of the human cerebral cortex estimated by intrinsic functional  
962 connectivity. *Journal of Neurophysiology*, 106(3), 1125–1165.  
963 <https://doi.org/10.1152/jn.00338.2011>
- 964 Zarahn, E., Aguirre, G. K., & D'Esposito, M. (1997). Empirical analyses of BOLD fMRI statistics.  
965 I. Spatially unsmoothed data collected under null-hypothesis conditions. *NeuroImage*,  
966 5(3), 179–197. <https://doi.org/10.1006/nimg.1997.0263>
- 967 Zhou, D., Cornblath, E. J., Stiso, J., Teich, E. G., Dworkin, J. D., Blevins, A. S., & Bassett, D. S.  
968 (2020). *Gender Diversity Statement and Code Notebook v1.0*. Zenodo.  
969 <https://doi.org/10.5281/zenodo.3672110>

970 **SUPPLEMENTAL INFORMATION**

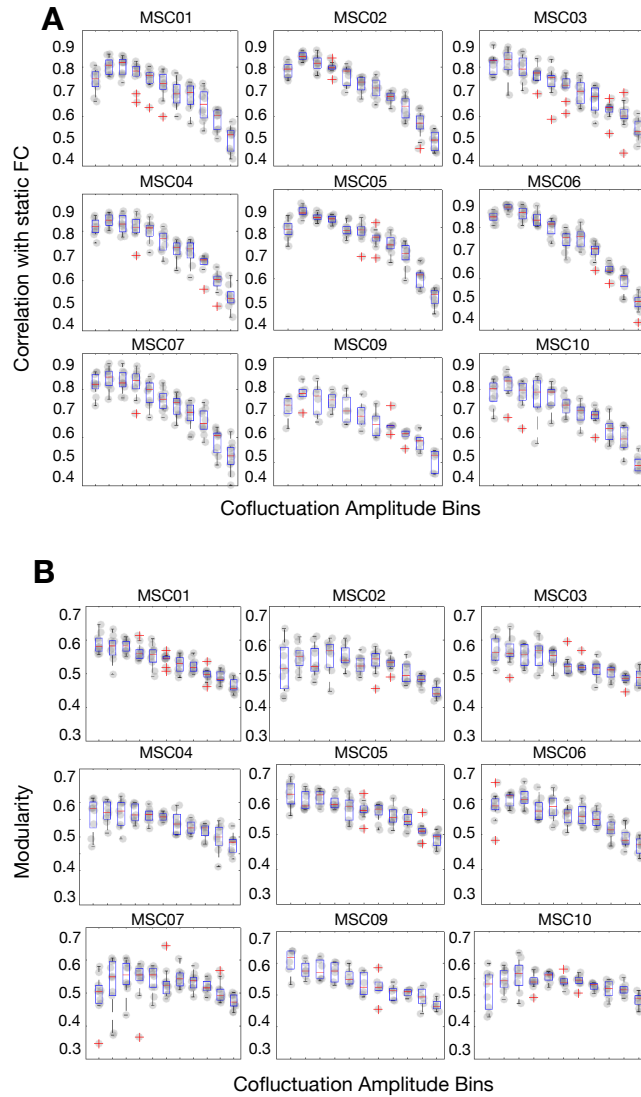

971  
972 **Fig S1, related to Fig 1:** Individual subject results for Fig 1 analyses. In all subjects and  
973 sessions, the relationships present between cofluctuation and correlation with time-averaged FC  
974 (A) and modularity (B) are continuous, positive, and gradual. It suggests that in all cases,  
975 neither high or low cofluctuation time points are discrete. Boxplots show the median, 25<sup>th</sup> and  
976 75<sup>th</sup> percentile values per subject calculated across sessions.

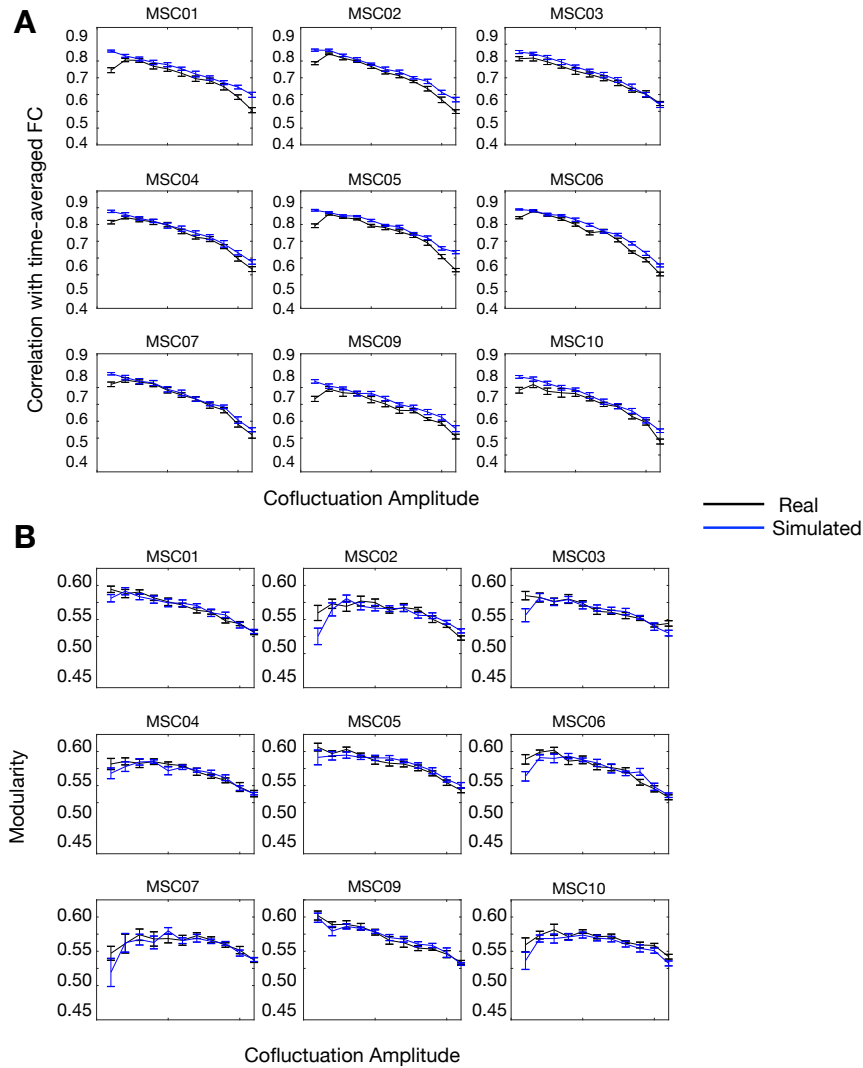

977  
978  
979  
980  
981  
982

**Fig S2, related to Fig 2:** Individual subject results for simulation analysis. In all subjects, the relationships present between cofluctuation amplitude and correlation with time-averaged FC (A) and modularity (B) are continuous, positive, and extremely similar to the relationships present in real data. This suggests sampling variability in static FC is sufficient to explain the presence of high and low cofluctuation points in real data.

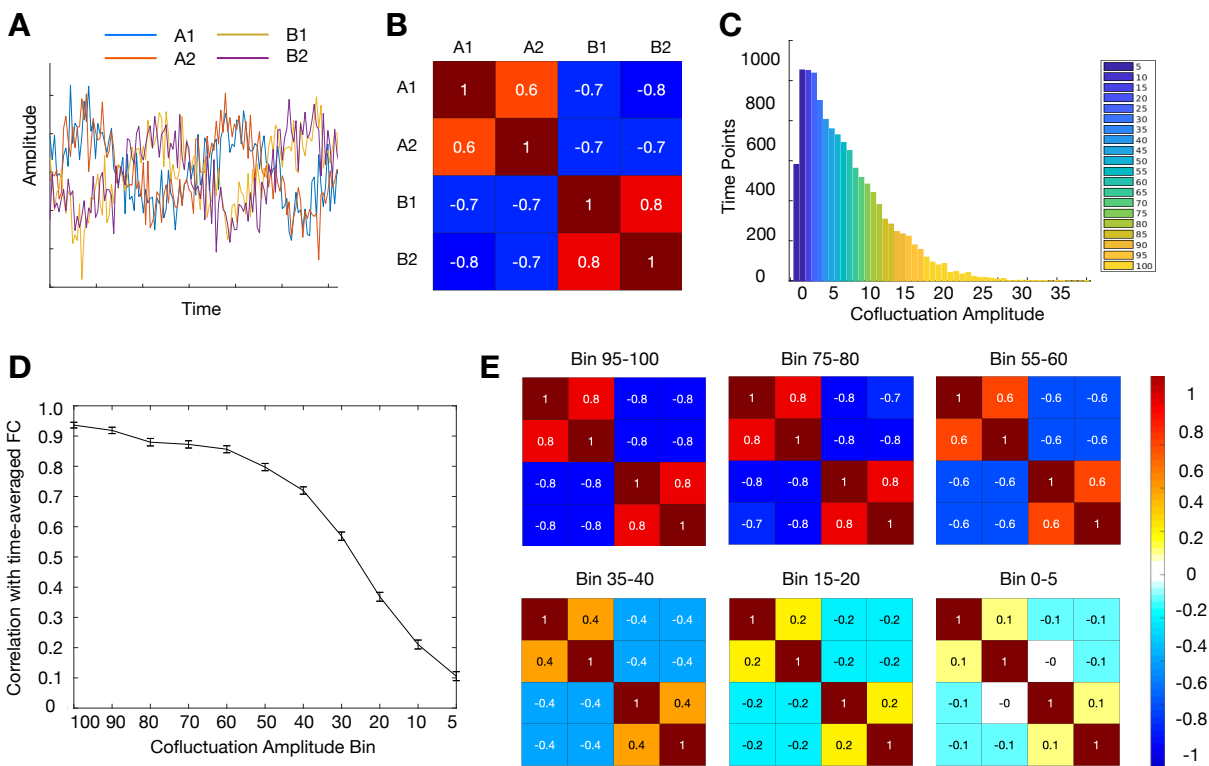

983  
 984 **Figure S3, Related to Fig 2:** The relationship between network structure and cofluctuation is  
 985 present in extremely simple non-BOLD-like models. We created a 2 network, 4 node model from  
 986 sine waves and tested the relationship between network structure and cofluctuation. (A)  
 987 Network A is made of two nodes, each with the sine( $t$ ) wave. Network B is made of two nodes,  
 988 each with sine( $t+\pi/2$ ) wave. Random noise was added to all four nodes. (B) Over the time  
 989 course, there is moderately high magnitude ( $r = 0.7$ ) correlation between in-network nodes. (C)  
 990 As in real data, there were points of high and low cofluctuation so it was possible to bin time  
 991 points the same way as was done in real and BOLD-simulated data. (D) A similar relationship  
 992 exists between cofluctuation and network structure where higher cofluctuation bins are better  
 993 able to reproduce network structure from the overall time course. Error bars here represent  
 994 SEM over 1000 iterations of the model. (E) This relationship is visually obvious in correlation  
 995 matrices. In high cofluctuation bins, the two antagonistic networks are strongly present, and in  
 996 low bins there is little or no relationship between nodes.



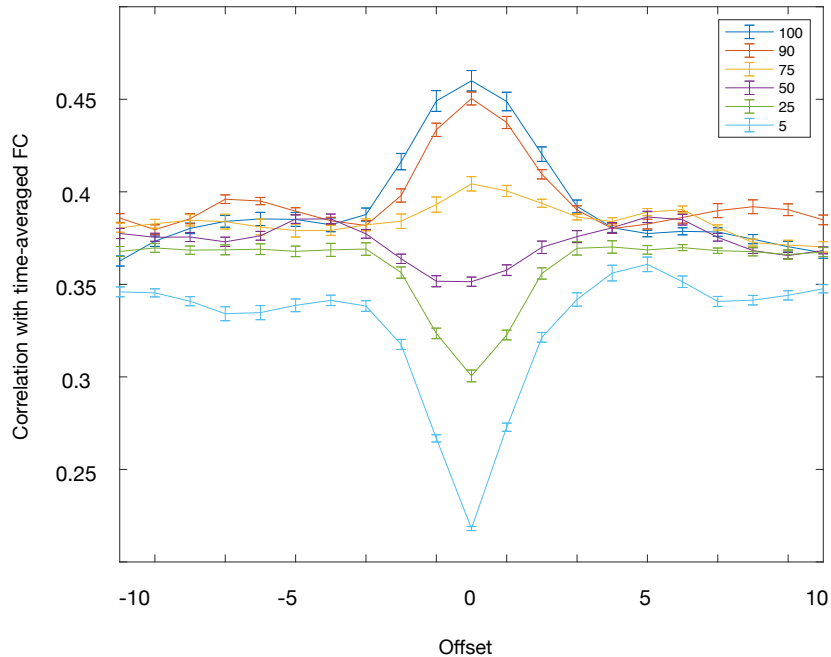

997  
998 **Figure S4, Related to Fig 3:** After accounting for spacing, there remains a graded hierarchy of  
999 network structure with cofluctuation. We completed a circular shifting analysis (see *Methods*)  
1000 where time points are binned by cofluctuation and then circularly offset. Due to scrubbing, it was  
1001 not possible to select as many time points per bin (typically all time points, 5% of total time  
1002 points) without running into scrubbed points while circularly shifting the values. To address this  
1003 issue, we randomly sampled only 5 eligible points per bin and used fewer bins (95-100, 85-90,  
1004 70-75, 45-50, 20-25, 0-5). This resulted in a smaller number of sessions (53/90) which  
1005 contained full data for all bin and shift combinations. Because we used only five points,  
1006 correlation values (maximum = 0.45 in group data) were much lower than when we calculate  
1007 similarity with session FC using 5% of available points. We completed 100 iterations of this  
1008 analysis and averaged the results to reduce single trial bias of the random selection of 5 eligible  
1009 points. Higher cofluctuation bins have stronger correlation with time averaged FC compared to  
1010 their offset counterparts and lower cofluctuation bins have weaker correlation. This suggests  
1011 that while temporal spacing does in part drive the similarity of events to static network structure,  
1012 there is a relationship between cofluctuation and network structure. Fig 2 suggests this is  
1013 parsimoniously explained by sampling variability.
